# Supplementary material for: Effects of Antiplatelet Therapy After Stroke Caused by Intracerebral Hemorrhage: Extended Follow-up of the RESTART Randomized Clinical Trial
Source: PubMed Central journal article supplement (PMC8417806; doi:10.1001/jamaneurol.2021.2956), 2021-09-03
Supplement: jamaneurol-e212956-s003.pdf [file jamaneurol-e212956-s003.pdf]

Supplemental Online Content: Nonauthor Collaborators

\*Indicates required information. Only first name, last name, and suffix will appear in PubMed.

**Group Name:\* Members of the RESTART Collaboration**

| First Name, Middle Initial* | Last Name* | Suffix* | Academic Degrees | Institution                                                                | Location (city, state/province, country) | Role or Contribution, eg, chair, principal investigator | Subgroup, eg, Steering Committee |
|-----------------------------|------------|---------|------------------|----------------------------------------------------------------------------|------------------------------------------|---------------------------------------------------------|----------------------------------|
| Colin                       | Baigent    |         |                  | University of Oxford                                                       | Oxford, UK                               | Independent chairperson                                 | Trial steering committee         |
| Daniel                      | Lasserson  |         |                  | University of Warwick                                                      | Warwick, UK                              | Independent member                                      | Trial steering committee         |
| Frank                       | Sullivan   |         |                  | University of St Andrews                                                   | St Andrews, UK                           | Independent member                                      | Trial steering committee         |
| Johanna                     | Carrie     |         |                  |                                                                            |                                          | Independent patient representative                      | Trial steering committee         |
| David                       | Newby      |         |                  | University of Edinburgh                                                    | Edinburgh, UK                            | Member                                                  | Trial steering committee         |
| Nikola                      | Sprigg     |         |                  | University of Nottingham                                                   | Nottingham, UK                           | Member                                                  | Trial steering committee         |
| Javier                      | Rojas      |         |                  | Academic and Clinical Central Office for Research and Development (ACCORD) | Edinburgh, UK                            | Sponsor representative                                  | Trial steering committee         |
| Bernadette                  | Gallagher  |         |                  | Academic and Clinical Central Office for Research and Development (ACCORD) | Edinburgh, UK                            | Sponsor representative                                  |                                  |
| Elizabeth                   | Brownsell  |         |                  | Academic and Clinical Central Office for Research and Development (ACCORD) | Edinburgh, UK                            | Sponsor representative                                  |                                  |

Supplemental Online Content: Nonauthor Collaborators

\*Indicates required information. Only first name, last name, and suffix will appear in PubMed.

| First Name, Middle Initial* | Last Name* | Suffix* | Academic Degrees | Institution                                                                | Location (city, state/province, country) | Role or Contribution, eg, chair, principal investigator | Subgroup, eg, Steering Committee |
|-----------------------------|------------|---------|------------------|----------------------------------------------------------------------------|------------------------------------------|---------------------------------------------------------|----------------------------------|
| Paul                        | Dearie     |         |                  | Academic and Clinical Central Office for Research and Development (ACCORD) | Edinburgh, UK                            | Clinical Research Facilitation Manager                  |                                  |
| Alice                       | Graves     |         |                  | Academic and Clinical Central Office for Research and Development (ACCORD) | Edinburgh, UK                            |                                                         |                                  |
| Louisa                      | Wilson     |         |                  | Academic and Clinical Central Office for Research and Development (ACCORD) | Edinburgh, UK                            |                                                         |                                  |
| Gelna                       | Hamer      |         |                  | Academic and Clinical Central Office for Research and Development (ACCORD) | Edinburgh, UK                            |                                                         |                                  |
| Elizabeth                   | Craig      |         |                  | Academic and Clinical Central Office for Research and Development (ACCORD) | Edinburgh, UK                            |                                                         |                                  |
| Priscilla                   | Sauramba   |         |                  | Academic and Clinical Central Office for Research and Development (ACCORD) | Edinburgh, UK                            |                                                         |                                  |

Supplemental Online Content: Nonauthor Collaborators

\*Indicates required information. Only first name, last name, and suffix will appear in PubMed.

| First Name, Middle Initial* | Last Name* | Suffix* | Academic Degrees | Institution                                                                | Location (city, state/province, country) | Role or Contribution, eg, chair, principal investigator | Subgroup, eg, Steering Committee |
|-----------------------------|------------|---------|------------------|----------------------------------------------------------------------------|------------------------------------------|---------------------------------------------------------|----------------------------------|
| Nicola                      | Lyttle     |         |                  | Academic and Clinical Central Office for Research and Development (ACCORD) | Edinburgh, UK                            |                                                         |                                  |
| Shannon                     | Amoils     |         |                  | British Heart Foundation                                                   | London, UK                               | Funder representative                                   | Trial steering committee         |
| John                        | Bamford    |         |                  | University of Leeds                                                        | Leeds, UK                                | Chairperson                                             | Data monitoring committee        |
| Jane                        | Armitage   |         |                  | University of Oxford                                                       | Oxford, UK                               | Member                                                  | Data monitoring committee        |
| Gabriel                     | Rinkel     |         |                  | UMC Utrecht                                                                | Utrecht, The Netherlands                 | Member                                                  | Data monitoring committee        |
| Gordon                      | Lowe       |         |                  | University of Glasgow                                                      | Glasgow, UK                              | Member                                                  | Data monitoring committee        |
| Jonathan                    | Emberson   |         |                  | University of Oxford                                                       | Oxford, UK                               | Member                                                  | Data monitoring committee        |
| Karen                       | Innes      |         |                  | University of Edinburgh                                                    | Edinburgh, UK                            | Senior Trial Manager                                    |                                  |
| Lynn                        | Dinsmore   |         |                  | University of Edinburgh                                                    | Edinburgh, UK                            | Imaging Manager                                         |                                  |
| Jonathan                    | Drever     |         |                  | University of Edinburgh                                                    | Edinburgh, UK                            | Data Manager                                            |                                  |
| Carol                       | Williams   |         |                  | University of Edinburgh                                                    | Edinburgh, UK                            | Centre Coordinator                                      |                                  |
| David                       | Perry      |         |                  | University of Edinburgh                                                    | Edinburgh, UK                            | Database programmer                                     |                                  |
| Connor                      | McGill     |         |                  | University of Edinburgh                                                    | Edinburgh, UK                            | Database programmer                                     |                                  |
| David                       | Buchanan   |         |                  | University of Edinburgh                                                    | Edinburgh, UK                            | Database programmer                                     |                                  |

Supplemental Online Content: Nonauthor Collaborators

\*Indicates required information. Only first name, last name, and suffix will appear in PubMed.

| First Name, Middle Initial* | Last Name* | Suffix* | Academic Degrees | Institution             | Location (city, state/province, country) | Role or Contribution, eg, chair, principal investigator | Subgroup, eg, Steering Committee |
|-----------------------------|------------|---------|------------------|-------------------------|------------------------------------------|---------------------------------------------------------|----------------------------------|
| Allan                       | Walker     |         |                  | University of Edinburgh | Edinburgh, UK                            | Database programmer                                     |                                  |
| Aidan                       | Hutchison  |         |                  | University of Edinburgh | Edinburgh, UK                            | Database programmer                                     |                                  |
| Christopher                 | Matthews   |         |                  | University of Edinburgh | Edinburgh, UK                            | Database programmer                                     |                                  |
| Ruth                        | Fraser     |         |                  | University of Edinburgh | Edinburgh, UK                            | Trial Support Officer                                   |                                  |
| Aileen                      | McGrath    |         |                  | University of Edinburgh | Edinburgh, UK                            | Trial Support Officer                                   |                                  |
| Ann                         | Deary      |         |                  | University of Edinburgh | Edinburgh, UK                            | Trial Support Officer                                   |                                  |
| Rosemary                    | Anderson   |         |                  | University of Edinburgh | Edinburgh, UK                            | Trial Support Officer                                   |                                  |
| Pauli                       | Walker     |         |                  | University of Edinburgh | Edinburgh, UK                            | Trial Support Officer                                   |                                  |
| Kasia                       | Adamczuk   |         |                  | University of Edinburgh | Edinburgh, UK                            | SoSTART Trial Manager                                   |                                  |
| Christian                   | Hansen     |         |                  | University of Edinburgh | Edinburgh, UK                            | Unblinded independent statistician                      |                                  |
| Richard                     | Parker     |         |                  | University of Edinburgh | Edinburgh, UK                            | Unblinded independent statistician                      |                                  |
| Robert                      | Lee        |         |                  | University of Edinburgh | Edinburgh, UK                            | Unblinded independent statistician                      |                                  |
| Malcolm                     | Macleod    |         |                  | University of Edinburgh | Edinburgh, UK                            | Outcome event internal adjudicator                      |                                  |
| Thomas                      | Moullaali  |         |                  | University of Edinburgh | Edinburgh, UK                            | Outcome event internal adjudicator                      |                                  |

Supplemental Online Content: Nonauthor Collaborators

\*Indicates required information. Only first name, last name, and suffix will appear in PubMed.

| First Name, Middle Initial* | Last Name* | Suffix* | Academic Degrees | Institution                             | Location (city, state/province, country) | Role or Contribution, eg, chair, principal investigator | Subgroup, eg, Steering Committee |
|-----------------------------|------------|---------|------------------|-----------------------------------------|------------------------------------------|---------------------------------------------------------|----------------------------------|
| Jeb                         | Palmer     |         |                  | University of Edinburgh                 | Edinburgh, UK                            | Programmer                                              |                                  |
| Eleni                       | Sakka      |         |                  | University of Edinburgh                 | Edinburgh, UK                            | Imaging Manager                                         |                                  |
| Jennifer                    | Adil-Smith |         |                  | University of Edinburgh                 | Edinburgh, UK                            | Imaging Manager                                         |                                  |
| David                       | Minks      |         |                  | Newcastle-upon-Tyne Hospitals NHS Trust | Newcastle-upon-Tyne, UK                  | Brain imaging assessor                                  |                                  |
| Dipayan                     | Mitra      |         |                  | Newcastle-upon-Tyne Hospitals NHS Trust | Newcastle-upon-Tyne, UK                  | Brain imaging assessor                                  |                                  |
| Priya                       | Bhatnagar  |         |                  | Newcastle-upon-Tyne Hospitals NHS Trust | Newcastle-upon-Tyne, UK                  | Brain imaging assessor                                  |                                  |
| Johannes                    | du Plessis |         |                  | NHS Lothian                             | Edinburgh, UK                            | Brain imaging assessor                                  |                                  |
| Yogish                      | Joshi      |         |                  | Addenbrooke's Hospital                  | Cambridge, UK                            | Brain imaging assessor                                  |                                  |
| Kelly                       | Stewart    |         |                  | University of Edinburgh                 | Edinburgh, UK                            | Trial Support Officer                                   |                                  |
| Kate                        | Covil      |         |                  | University of Edinburgh                 | Edinburgh, UK                            | Research nurse                                          |                                  |
| Mark                        | Rodrigues  |         |                  | University of Edinburgh                 | Edinburgh, UK                            | Brain imaging assessor                                  |                                  |
| Christine                   | Lerpiniere |         |                  |                                         |                                          |                                                         |                                  |
| Richard                     | O'Brien    |         |                  |                                         |                                          |                                                         |                                  |
| Seona                       | Burgess    |         |                  |                                         |                                          |                                                         |                                  |
| Gillian                     | Mead       |         |                  |                                         |                                          |                                                         |                                  |
| Ruth                        | Paulton    |         |                  |                                         |                                          |                                                         |                                  |
| Fergus                      | Doubal     |         |                  |                                         |                                          |                                                         |                                  |
| Katrina                     | McCormick  |         |                  |                                         |                                          |                                                         |                                  |
| Neil                        | Hunter     |         |                  |                                         |                                          |                                                         |                                  |
| Pat                         | Taylor     |         |                  |                                         |                                          |                                                         |                                  |

Supplemental Online Content: Nonauthor Collaborators

\*Indicates required information. Only first name, last name, and suffix will appear in PubMed.

| First Name, Middle Initial* | Last Name*      | Suffix* | Academic Institution Degrees | Location (city, state/province, country) | Role or Contribution, eg, chair, principal investigator | Subgroup, eg, Steering Committee |
|-----------------------------|-----------------|---------|------------------------------|------------------------------------------|---------------------------------------------------------|----------------------------------|
| Ruwan                       | Parakramawansha |         |                              |                                          |                                                         |                                  |
| Jack                        | Perry           |         |                              |                                          |                                                         |                                  |
| Gordon                      | Blair           |         |                              |                                          |                                                         |                                  |
| Allan                       | MacRaid         |         |                              |                                          |                                                         |                                  |
| Adrian                      | Parry-Jones     |         |                              |                                          |                                                         |                                  |
| Mary                        | Johnes          |         |                              |                                          |                                                         |                                  |
| Stephanie                   | Lee             |         |                              |                                          |                                                         |                                  |
| Kelly Marie                 | Shaw            |         |                              |                                          |                                                         |                                  |
| Ilse                        | Burger          |         |                              |                                          |                                                         |                                  |
| Martin                      | Punter          |         |                              |                                          |                                                         |                                  |
| Andrea                      | Ingham          |         |                              |                                          |                                                         |                                  |
| Jane                        | Perez           |         |                              |                                          |                                                         |                                  |
| Zin                         | Naing           |         |                              |                                          |                                                         |                                  |
| Jordi                       | Morell          |         |                              |                                          |                                                         |                                  |
| Tracy                       | Marsden         |         |                              |                                          |                                                         |                                  |
| Andrea                      | Hall            |         |                              |                                          |                                                         |                                  |
| Sally                       | Marshall        |         |                              |                                          |                                                         |                                  |
| Louise                      | Harrison        |         |                              |                                          |                                                         |                                  |
| Rowilson                    | Jarapa          |         |                              |                                          |                                                         |                                  |
| Edith                       | Wood            |         |                              |                                          |                                                         |                                  |
| Victoria                    | O'Loughlin      |         |                              |                                          |                                                         |                                  |
| David                       | Cohen           |         |                              |                                          |                                                         |                                  |
| Silvie                      | Davies          |         |                              |                                          |                                                         |                                  |
| Kelechi                     | Njoku           |         |                              |                                          |                                                         |                                  |
| Mushiya                     | Mpelembue       |         |                              |                                          |                                                         |                                  |
| Laura                       | Burgess         |         |                              |                                          |                                                         |                                  |
| Radim                       | Licenik         |         |                              |                                          |                                                         |                                  |
| Mmua                        | Ngwako          |         |                              |                                          |                                                         |                                  |
| Nabeela                     | Nisar           |         |                              |                                          |                                                         |                                  |

Supplemental Online Content: Nonauthor Collaborators

\*Indicates required information. Only first name, last name, and suffix will appear in PubMed.

| First Name, Middle Initial* | Last Name*   | Suffix* | Academic Degrees | Institution | Location (city, state/province, country) | Role or Contribution, eg, chair, principal investigator | Subgroup, eg, Steering Committee |
|-----------------------------|--------------|---------|------------------|-------------|------------------------------------------|---------------------------------------------------------|----------------------------------|
| Rangah                      | Niranchanan  |         |                  |             |                                          |                                                         |                                  |
| Tatjana                     | Roganova     |         |                  |             |                                          |                                                         |                                  |
| Rajaram                     | Bathula      |         |                  |             |                                          |                                                         |                                  |
| Joseph                      | Devine       |         |                  |             |                                          |                                                         |                                  |
| Anette                      | David        |         |                  |             |                                          |                                                         |                                  |
| Anne                        | Oshodi       |         |                  |             |                                          |                                                         |                                  |
| Fenglin                     | Guo          |         |                  |             |                                          |                                                         |                                  |
| Emmanuelle                  | Owoyele      |         |                  |             |                                          |                                                         |                                  |
| Varthi                      | Sukdeo       |         |                  |             |                                          |                                                         |                                  |
| Robert                      | Ballantine   |         |                  |             |                                          |                                                         |                                  |
| Mudhar                      | Abbdul-Saheb |         |                  |             |                                          |                                                         |                                  |
| Angela                      | Chamberlain  |         |                  |             |                                          |                                                         |                                  |
| Aberami                     | Chandrakumar |         |                  |             |                                          |                                                         |                                  |
| Philip                      | Poku         |         |                  |             |                                          |                                                         |                                  |
| Kirsty                      | Harkness     |         |                  |             |                                          |                                                         |                                  |
| Emma                        | Richards     |         |                  |             |                                          |                                                         |                                  |
| Ali                         | Ali          |         |                  |             |                                          |                                                         |                                  |
| Catrin                      | Blank        |         |                  |             |                                          |                                                         |                                  |
| Faith                       | Kibutu       |         |                  |             |                                          |                                                         |                                  |
| Olesia                      | Balitska     |         |                  |             |                                          |                                                         |                                  |
| Kathryn                     | Birchall     |         |                  |             |                                          |                                                         |                                  |
| Pauline                     | Bayliss      |         |                  |             |                                          |                                                         |                                  |
| Kathy                       | Stocks       |         |                  |             |                                          |                                                         |                                  |
| Arshad                      | Majis        |         |                  |             |                                          |                                                         |                                  |
| Clare                       | Doyle        |         |                  |             |                                          |                                                         |                                  |
| Jo                          | Howe         |         |                  |             |                                          |                                                         |                                  |
| Christine                   | Kamara       |         |                  |             |                                          |                                                         |                                  |
| Luke                        | Barron       |         |                  |             |                                          |                                                         |                                  |
| Ahmad                       | Maatouk      |         |                  |             |                                          |                                                         |                                  |

Supplemental Online Content: Nonauthor Collaborators

\*Indicates required information. Only first name, last name, and suffix will appear in PubMed.

| First Name, Middle Initial* | Last Name*       | Suffix* | Academic Degrees | Institution | Location (city, state/province, country) | Role or Contribution, eg, chair, principal investigator | Subgroup, eg, Steering Committee |
|-----------------------------|------------------|---------|------------------|-------------|------------------------------------------|---------------------------------------------------------|----------------------------------|
| Ralf                        | Lindert          |         |                  |             |                                          |                                                         |                                  |
| Katy                        | Dakin            |         |                  |             |                                          |                                                         |                                  |
| Jessica                     | Redgrave         |         |                  |             |                                          |                                                         |                                  |
| John                        | France           |         |                  |             |                                          |                                                         |                                  |
| Dawn                        | Tomlin           |         |                  |             |                                          |                                                         |                                  |
| Helen                       | Bearne           |         |                  |             |                                          |                                                         |                                  |
| Isam                        | Salih            |         |                  |             |                                          |                                                         |                                  |
| Debs                        | Kelly            |         |                  |             |                                          |                                                         |                                  |
| Susan                       | Szabo            |         |                  |             |                                          |                                                         |                                  |
| Biju                        | Bhaskaran        |         |                  |             |                                          |                                                         |                                  |
| Jean                        | Buxton           |         |                  |             |                                          |                                                         |                                  |
| Pauline                     | Fitzell          |         |                  |             |                                          |                                                         |                                  |
| Georgina                    | Ayres            |         |                  |             |                                          |                                                         |                                  |
| Afaq                        | Sulat            |         |                  |             |                                          |                                                         |                                  |
| Kathleen                    | Horan            |         |                  |             |                                          |                                                         |                                  |
| Joanne                      | Garfield-Smith   |         |                  |             |                                          |                                                         |                                  |
| Harbens                     | Bhakri           |         |                  |             |                                          |                                                         |                                  |
| Stacey                      | Atkins           |         |                  |             |                                          |                                                         |                                  |
| Joan                        | Redome           |         |                  |             |                                          |                                                         |                                  |
| Paul                        | Guyler           |         |                  |             |                                          |                                                         |                                  |
| Thayalini                   | Loganathan       |         |                  |             |                                          |                                                         |                                  |
| Amber                       | Siddiqui         |         |                  |             |                                          |                                                         |                                  |
| Anwer                       | Siddiqui         |         |                  |             |                                          |                                                         |                                  |
| Lucy                        | Coward           |         |                  |             |                                          |                                                         |                                  |
| Devesh                      | Sinha            |         |                  |             |                                          |                                                         |                                  |
| Swapna                      | Kunhunny         |         |                  |             |                                          |                                                         |                                  |
| Sharon                      | Tysoe            |         |                  |             |                                          |                                                         |                                  |
| Rajalakshmi                 | Orath Prabakaran |         |                  |             |                                          |                                                         |                                  |
| Shyam                       | Kelavkar         |         |                  |             |                                          |                                                         |                                  |



Supplemental Online Content: Nonauthor Collaborators

\*Indicates required information. Only first name, last name, and suffix will appear in PubMed.

| First Name, Middle Initial* | Last Name*     | Suffix* | Academic Degrees | Institution | Location (city, state/province, country) | Role or Contribution, eg, chair, principal investigator | Subgroup, eg, Steering Committee |
|-----------------------------|----------------|---------|------------------|-------------|------------------------------------------|---------------------------------------------------------|----------------------------------|
| Sindhu                      | Rashmi         |         |                  |             |                                          |                                                         |                                  |
| David                       | Ng             |         |                  |             |                                          |                                                         |                                  |
| Kheng Xiong                 | Ng             |         |                  |             |                                          |                                                         |                                  |
| Nisha                       | Menon          |         |                  |             |                                          |                                                         |                                  |
| Sweni                       | Shah           |         |                  |             |                                          |                                                         |                                  |
| Mark                        | Barber         |         |                  |             |                                          |                                                         |                                  |
| Derek                       | Esson          |         |                  |             |                                          |                                                         |                                  |
| Fiona                       | Brodie         |         |                  |             |                                          |                                                         |                                  |
| Talat                       | Anjum          |         |                  |             |                                          |                                                         |                                  |
| Manju                       | Krishnan       |         |                  |             |                                          |                                                         |                                  |
| Leanne                      | Quinn          |         |                  |             |                                          |                                                         |                                  |
| Jayne                       | Spencer        |         |                  |             |                                          |                                                         |                                  |
| Terry                       | Jones          |         |                  |             |                                          |                                                         |                                  |
| Helen                       | Thompson Jones |         |                  |             |                                          |                                                         |                                  |
| Srikanth                    | Chenna         |         |                  |             |                                          |                                                         |                                  |
| Sharon                      | Storton        |         |                  |             |                                          |                                                         |                                  |
| Lynne                       | Dacey          |         |                  |             |                                          |                                                         |                                  |
| Sarah                       | Thomas         |         |                  |             |                                          |                                                         |                                  |
| Teresa                      | Beaty          |         |                  |             |                                          |                                                         |                                  |
| Mushtaq                     | Wani           |         |                  |             |                                          |                                                         |                                  |
| Shelley                     | Treadwell      |         |                  |             |                                          |                                                         |                                  |
| Caroline                    | Davies         |         |                  |             |                                          |                                                         |                                  |
| Susan                       | Tucker         |         |                  |             |                                          |                                                         |                                  |
| Lynda                       | Connor         |         |                  |             |                                          |                                                         |                                  |
| Glyn                        | Gainard        |         |                  |             |                                          |                                                         |                                  |
| Peter                       | Slade          |         |                  |             |                                          |                                                         |                                  |
| Girish                      | Muddegowda     |         |                  |             |                                          |                                                         |                                  |
| Nenette                     | Abano          |         |                  |             |                                          |                                                         |                                  |
| Alda                        | Remegoso       |         |                  |             |                                          |                                                         |                                  |

Supplemental Online Content: Nonauthor Collaborators

\*Indicates required information. Only first name, last name, and suffix will appear in PubMed.

| First Name, Middle Initial* | Last Name*  | Suffix* | Academic Degrees | Institution | Location (city, state/province, country) | Role or Contribution, eg, chair, principal investigator | Subgroup, eg, Steering Committee |
|-----------------------------|-------------|---------|------------------|-------------|------------------------------------------|---------------------------------------------------------|----------------------------------|
| Racquel                     | Carpio      |         |                  |             |                                          |                                                         |                                  |
| Chelsea                     | Causley     |         |                  |             |                                          |                                                         |                                  |
| Stephanie                   | Stevens     |         |                  |             |                                          |                                                         |                                  |
| Adrian                      | Butler      |         |                  |             |                                          |                                                         |                                  |
| Resti                       | Varquez     |         |                  |             |                                          |                                                         |                                  |
| Andrew                      | Moores      |         |                  |             |                                          |                                                         |                                  |
| Francis                     | Alipio      |         |                  |             |                                          |                                                         |                                  |
| Hayley                      | Denic       |         |                  |             |                                          |                                                         |                                  |
| Ranjan                      | Sanyal      |         |                  |             |                                          |                                                         |                                  |
| Adrian                      | Barry       |         |                  |             |                                          |                                                         |                                  |
| Holly                       | Maguire     |         |                  |             |                                          |                                                         |                                  |
| Jeanette                    | Grocott     |         |                  |             |                                          |                                                         |                                  |
| Kay                         | Finney      |         |                  |             |                                          |                                                         |                                  |
| Sue                         | Lyjko       |         |                  |             |                                          |                                                         |                                  |
| Christine                   | Roffe       |         |                  |             |                                          |                                                         |                                  |
| Joanne                      | Hiden       |         |                  |             |                                          |                                                         |                                  |
| Phillip                     | Ferdinand   |         |                  |             |                                          |                                                         |                                  |
| Vera                        | Cvoro       |         |                  |             |                                          |                                                         |                                  |
| Khalil                      | Ullah       |         |                  |             |                                          |                                                         |                                  |
| Nicola                      | Chapman     |         |                  |             |                                          |                                                         |                                  |
| Mandy                       | Couser      |         |                  |             |                                          |                                                         |                                  |
| Susan                       | Pound       |         |                  |             |                                          |                                                         |                                  |
| Katrina                     | McCormick   |         |                  |             |                                          |                                                         |                                  |
| Sean                        | Mcauley     |         |                  |             |                                          |                                                         |                                  |
| Senthil                     | Raghunathan |         |                  |             |                                          |                                                         |                                  |
| Faye                        | Shelton     |         |                  |             |                                          |                                                         |                                  |
| Amanda                      | Hedstrom    |         |                  |             |                                          |                                                         |                                  |
| Margi                       | Godfrey     |         |                  |             |                                          |                                                         |                                  |
| Diane                       | Havard      |         |                  |             |                                          |                                                         |                                  |

Supplemental Online Content: Nonauthor Collaborators

\*Indicates required information. Only first name, last name, and suffix will appear in PubMed.

| First Name, Middle Initial* | Last Name*      | Suffix* | Academic Institution Degrees | Location (city, state/province, country) | Role or Contribution, eg, chair, principal investigator | Subgroup, eg, Steering Committee |
|-----------------------------|-----------------|---------|------------------------------|------------------------------------------|---------------------------------------------------------|----------------------------------|
| Amanda                      | Buck            |         |                              |                                          |                                                         |                                  |
| Kailash                     | Krishnan        |         |                              |                                          |                                                         |                                  |
| Nicola                      | Gilzeane        |         |                              |                                          |                                                         |                                  |
| Jack                        | Roffe           |         |                              |                                          |                                                         |                                  |
| Judith                      | Clarke          |         |                              |                                          |                                                         |                                  |
| Saima                       | Sheikh          |         |                              |                                          |                                                         |                                  |
| Nikola                      | Sprigg          |         |                              |                                          |                                                         |                                  |
| Katherine                   | Whittamore      |         |                              |                                          |                                                         |                                  |
| Rekha                       | Keshvara        |         |                              |                                          |                                                         |                                  |
| Carla                       | Jordan          |         |                              |                                          |                                                         |                                  |
| Gwendoline                  | Wilkes          |         |                              |                                          |                                                         |                                  |
| Benjamin                    | Jackson         |         |                              |                                          |                                                         |                                  |
| Jason                       | Appleton        |         |                              |                                          |                                                         |                                  |
| Zhe                         | Law             |         |                              |                                          |                                                         |                                  |
| Oliver                      | Matias          |         |                              |                                          |                                                         |                                  |
| Evangelos                   | Vasileiadis     |         |                              |                                          |                                                         |                                  |
| Cathy                       | Mason           |         |                              |                                          |                                                         |                                  |
| Anthea                      | Parry           |         |                              |                                          |                                                         |                                  |
| Geraldine                   | Landers         |         |                              |                                          |                                                         |                                  |
| Melinda                     | Holden          |         |                              |                                          |                                                         |                                  |
| Basaam                      | Aweid           |         |                              |                                          |                                                         |                                  |
| Khalid                      | Rashed          |         |                              |                                          |                                                         |                                  |
| Linda                       | Balian          |         |                              |                                          |                                                         |                                  |
| Carinna                     | Vickers         |         |                              |                                          |                                                         |                                  |
| Elizabeth                   | Keeling         |         |                              |                                          |                                                         |                                  |
| Sarah                       | Board           |         |                              |                                          |                                                         |                                  |
| Joanna                      | Allison         |         |                              |                                          |                                                         |                                  |
| Clare                       | Buckley         |         |                              |                                          |                                                         |                                  |
| Barbara                     | Williams-Yesson |         |                              |                                          |                                                         |                                  |

Supplemental Online Content: Nonauthor Collaborators

\*Indicates required information. Only first name, last name, and suffix will appear in PubMed.

| First Name, Middle Initial* | Last Name*  | Suffix* | Academic Degrees | Institution | Location (city, state/province, country) | Role or Contribution, eg, chair, principal investigator | Subgroup, eg, Steering Committee |
|-----------------------------|-------------|---------|------------------|-------------|------------------------------------------|---------------------------------------------------------|----------------------------------|
| Joanne                      | Board       |         |                  |             |                                          |                                                         |                                  |
| Tressy                      | Pitt-Kerby  |         |                  |             |                                          |                                                         |                                  |
| Alfonso                     | Tanate      |         |                  |             |                                          |                                                         |                                  |
| Diane                       | Wood        |         |                  |             |                                          |                                                         |                                  |
| Dinesh                      | Chadha      |         |                  |             |                                          |                                                         |                                  |
| Manohar                     | Kini        |         |                  |             |                                          |                                                         |                                  |
| Deborah                     | Walstow     |         |                  |             |                                          |                                                         |                                  |
| Rosanna                     | Fong        |         |                  |             |                                          |                                                         |                                  |
| Robert                      | Luder       |         |                  |             |                                          |                                                         |                                  |
| Tolu                        | Adesina     |         |                  |             |                                          |                                                         |                                  |
| Jill                        | Gallagher   |         |                  |             |                                          |                                                         |                                  |
| Hayley                      | Bridger     |         |                  |             |                                          |                                                         |                                  |
| Elodie                      | Murali      |         |                  |             |                                          |                                                         |                                  |
| Larissa                     | Cuenoud     |         |                  |             |                                          |                                                         |                                  |
| Maneesh                     | Bhargava    |         |                  |             |                                          |                                                         |                                  |
| Chloe                       | Van Someren |         |                  |             |                                          |                                                         |                                  |
| Katja                       | Adie        |         |                  |             |                                          |                                                         |                                  |
| Gillian                     | Courtauld   |         |                  |             |                                          |                                                         |                                  |
| Christine                   | Schofield   |         |                  |             |                                          |                                                         |                                  |
| Abhijit                     | Mate        |         |                  |             |                                          |                                                         |                                  |
| Ali                         | James       |         |                  |             |                                          |                                                         |                                  |
| Frances                     | Harrington  |         |                  |             |                                          |                                                         |                                  |
| Linda                       | Lucas       |         |                  |             |                                          |                                                         |                                  |
| Kirsty                      | Bond        |         |                  |             |                                          |                                                         |                                  |
| Bev                         | Maund       |         |                  |             |                                          |                                                         |                                  |
| Sam                         | Ellis       |         |                  |             |                                          |                                                         |                                  |
| Emilie                      | Williams    |         |                  |             |                                          |                                                         |                                  |
| Sue                         | Webber      |         |                  |             |                                          |                                                         |                                  |
| Terri                       | Chant       |         |                  |             |                                          |                                                         |                                  |

Supplemental Online Content: Nonauthor Collaborators

\*Indicates required information. Only first name, last name, and suffix will appear in PubMed.

| First Name, Middle Initial* | Last Name* | Suffix* | Academic Degrees | Institution | Location (city, state/province, country) | Role or Contribution, eg, chair, principal investigator | Subgroup, eg, Steering Committee |
|-----------------------------|------------|---------|------------------|-------------|------------------------------------------|---------------------------------------------------------|----------------------------------|
| Elizabeth                   | Swanson    |         |                  |             |                                          |                                                         |                                  |
| Eleanor                     | King       |         |                  |             |                                          |                                                         |                                  |
| Abbie                       | Coutts     |         |                  |             |                                          |                                                         |                                  |
| Nicola                      | Yeo        |         |                  |             |                                          |                                                         |                                  |
| Paul                        | Mudd       |         |                  |             |                                          |                                                         |                                  |
| Martin                      | James      |         |                  |             |                                          |                                                         |                                  |
| Hayley                      | Kingwell   |         |                  |             |                                          |                                                         |                                  |
| Caroline                    | Roughan    |         |                  |             |                                          |                                                         |                                  |
| Anthony                     | Hemsley    |         |                  |             |                                          |                                                         |                                  |
| Jane                        | Sword      |         |                  |             |                                          |                                                         |                                  |
| Samantha                    | Keenan     |         |                  |             |                                          |                                                         |                                  |
| Angela                      | Bowring    |         |                  |             |                                          |                                                         |                                  |
| Julie                       | Cageao     |         |                  |             |                                          |                                                         |                                  |
| David                       | Strain     |         |                  |             |                                          |                                                         |                                  |
| Keniesha                    | Miller     |         |                  |             |                                          |                                                         |                                  |
| Anita                       | Goff       |         |                  |             |                                          |                                                         |                                  |
| Karin                       | Gupwell    |         |                  |             |                                          |                                                         |                                  |
| Kevin                       | Thorpe     |         |                  |             |                                          |                                                         |                                  |
| Hedley                      | Emsley     |         |                  |             |                                          |                                                         |                                  |
| Alison                      | McLoughlin |         |                  |             |                                          |                                                         |                                  |
| Sulaiman                    | Sultan     |         |                  |             |                                          |                                                         |                                  |
| Shuja                       | Punekar    |         |                  |             |                                          |                                                         |                                  |
| Bindu                       | Gregory    |         |                  |             |                                          |                                                         |                                  |
| Sonia                       | Raj        |         |                  |             |                                          |                                                         |                                  |
| Donna                       | Doyle      |         |                  |             |                                          |                                                         |                                  |
| Keith                       | Muir       |         |                  |             |                                          |                                                         |                                  |
| Wilma                       | Smith      |         |                  |             |                                          |                                                         |                                  |
| Fiona                       | Moreton    |         |                  |             |                                          |                                                         |                                  |
| Bharath Kumar               | Cheripelli |         |                  |             |                                          |                                                         |                                  |

Supplemental Online Content: Nonauthor Collaborators

\*Indicates required information. Only first name, last name, and suffix will appear in PubMed.

| First Name, Middle Initial* | Last Name*     | Suffix* | Academic Institution Degrees | Location (city, state/province, country) | Role or Contribution, eg, chair, principal investigator | Subgroup, eg, Steering Committee |
|-----------------------------|----------------|---------|------------------------------|------------------------------------------|---------------------------------------------------------|----------------------------------|
| Salwa                       | El Tawil       |         |                              |                                          |                                                         |                                  |
| Dheeraj                     | Kalladka       |         |                              |                                          |                                                         |                                  |
| Angela                      | Welch          |         |                              |                                          |                                                         |                                  |
| Xuya                        | Huang          |         |                              |                                          |                                                         |                                  |
| Nicola                      | Day            |         |                              |                                          |                                                         |                                  |
| Sankaranarayanan            | Ramachandran   |         |                              |                                          |                                                         |                                  |
| Caroline                    | Crosbie        |         |                              |                                          |                                                         |                                  |
| Jennifer                    | Elliot         |         |                              |                                          |                                                         |                                  |
| Peter                       | Sommerville    |         |                              |                                          |                                                         |                                  |
| Meegan                      | Gibbons        |         |                              |                                          |                                                         |                                  |
| Rowshanara                  | Ahmed          |         |                              |                                          |                                                         |                                  |
| Sagal                       | Kullane        |         |                              |                                          |                                                         |                                  |
| Katherine                   | Marks          |         |                              |                                          |                                                         |                                  |
| Ajay                        | Bhalla         |         |                              |                                          |                                                         |                                  |
| Jonathan                    | Birns          |         |                              |                                          |                                                         |                                  |
| Tony                        | Rudd           |         |                              |                                          |                                                         |                                  |
| Nic                         | Weir           |         |                              |                                          |                                                         |                                  |
| Christopher                 | Allen          |         |                              |                                          |                                                         |                                  |
| Vanessa                     | Pressly        |         |                              |                                          |                                                         |                                  |
| Pam                         | Crawford       |         |                              |                                          |                                                         |                                  |
| Emma                        | Battersby-Wood |         |                              |                                          |                                                         |                                  |
| Alex                        | Blades         |         |                              |                                          |                                                         |                                  |
| Shuna                       | Egerton        |         |                              |                                          |                                                         |                                  |
| Ashleigh                    | Walters        |         |                              |                                          |                                                         |                                  |
| James Richard               | Marigold       |         |                              |                                          |                                                         |                                  |
| Sue                         | Evans          |         |                              |                                          |                                                         |                                  |
| Fiona                       | Smith          |         |                              |                                          |                                                         |                                  |
| Gabriella                   | Howard         |         |                              |                                          |                                                         |                                  |
| Imogen                      | Gartrell       |         |                              |                                          |                                                         |                                  |

Supplemental Online Content: Nonauthor Collaborators

\*Indicates required information. Only first name, last name, and suffix will appear in PubMed.

| First Name, Middle Initial* | Last Name* | Suffix* | Academic Degrees | Institution | Location (city, state/province, country) | Role or Contribution, eg, chair, principal investigator | Subgroup, eg, Steering Committee |
|-----------------------------|------------|---------|------------------|-------------|------------------------------------------|---------------------------------------------------------|----------------------------------|
| Simon                       | Smith      |         |                  |             |                                          |                                                         |                                  |
| Chloe                       | Cox        |         |                  |             |                                          |                                                         |                                  |
| Robyn                       | Creeden    |         |                  |             |                                          |                                                         |                                  |
| Cherish                     | Boxall     |         |                  |             |                                          |                                                         |                                  |
| Jonathan                    | Hewitt     |         |                  |             |                                          |                                                         |                                  |
| Claire                      | Nott       |         |                  |             |                                          |                                                         |                                  |
| Procter                     | Sarah      |         |                  |             |                                          |                                                         |                                  |
| Jessica                     | Whiteman   |         |                  |             |                                          |                                                         |                                  |
| Steve                       | Buckle     |         |                  |             |                                          |                                                         |                                  |
| Rina                        | Mardania   |         |                  |             |                                          |                                                         |                                  |
| Jane                        | Gray       |         |                  |             |                                          |                                                         |                                  |
| Rebecca                     | Wallace    |         |                  |             |                                          |                                                         |                                  |
| Claire                      | Triscott   |         |                  |             |                                          |                                                         |                                  |
| Anand                       | Nair       |         |                  |             |                                          |                                                         |                                  |
| Jill                        | Greig      |         |                  |             |                                          |                                                         |                                  |
| Pratap                      | Rana       |         |                  |             |                                          |                                                         |                                  |
| Matthew                     | Robinson   |         |                  |             |                                          |                                                         |                                  |
| Mohammad Irfan              | Alam       |         |                  |             |                                          |                                                         |                                  |
| Ridha                       | Ramiz      |         |                  |             |                                          |                                                         |                                  |
| David                       | Werring    |         |                  |             |                                          |                                                         |                                  |
| Duncan                      | Wilson     |         |                  |             |                                          |                                                         |                                  |
| Caroline                    | Watchurst  |         |                  |             |                                          |                                                         |                                  |
| Maria                       | Brezitski  |         |                  |             |                                          |                                                         |                                  |
| Ifan                        | Jones      |         |                  |             |                                          |                                                         |                                  |
| Luci                        | Crook      |         |                  |             |                                          |                                                         |                                  |
| Azra                        | Banaras    |         |                  |             |                                          |                                                         |                                  |
| Krishna                     | Patel      |         |                  |             |                                          |                                                         |                                  |
| Renuka                      | Erande     |         |                  |             |                                          |                                                         |                                  |
| Caroline                    | Hogan      |         |                  |             |                                          |                                                         |                                  |

Supplemental Online Content: Nonauthor Collaborators

\*Indicates required information. Only first name, last name, and suffix will appear in PubMed.

| First Name, Middle Initial* | Last Name* | Suffix* | Academic Degrees | Institution | Location (city, state/province, country) | Role or Contribution, eg, chair, principal investigator | Subgroup, eg, Steering Committee |
|-----------------------------|------------|---------|------------------|-------------|------------------------------------------|---------------------------------------------------------|----------------------------------|
| Talal                       | Al-Mayhani |         |                  |             |                                          |                                                         |                                  |
| Isabel                      | Hostettler |         |                  |             |                                          |                                                         |                                  |
| Amy                         | Ashton     |         |                  |             |                                          |                                                         |                                  |
| Shez                        | Feerick    |         |                  |             |                                          |                                                         |                                  |
| Nina                        | Francia    |         |                  |             |                                          |                                                         |                                  |
| Nnebuife                    | Oji        |         |                  |             |                                          |                                                         |                                  |
| Emma                        | Elliott    |         |                  |             |                                          |                                                         |                                  |
| Martin                      | Dennis     |         |                  |             |                                          |                                                         |                                  |
| William                     | Whiteley   |         |                  |             |                                          |                                                         |                                  |
| Cathie                      | Sudlow     |         |                  |             |                                          |                                                         |                                  |
| Christine                   | Lerpiniere |         |                  |             |                                          |                                                         |                                  |
| Dipankar                    | Dutta      |         |                  |             |                                          |                                                         |                                  |
| Pauline                     | Brown      |         |                  |             |                                          |                                                         |                                  |
| Deborah                     | Ward       |         |                  |             |                                          |                                                         |                                  |
| Fiona                       | Davis      |         |                  |             |                                          |                                                         |                                  |
| Jennifer                    | Turfrey    |         |                  |             |                                          |                                                         |                                  |
| Chloe                       | Hughes     |         |                  |             |                                          |                                                         |                                  |
| Kayleigh                    | Collins    |         |                  |             |                                          |                                                         |                                  |
| Rehana                      | Bakawala   |         |                  |             |                                          |                                                         |                                  |
| Susan                       | O'Connell  |         |                  |             |                                          |                                                         |                                  |
| Jon                         | Glass      |         |                  |             |                                          |                                                         |                                  |
| David                       | Broughton  |         |                  |             |                                          |                                                         |                                  |
| Lynn                        | Dixon      |         |                  |             |                                          |                                                         |                                  |
| Kath                        | Chapman    |         |                  |             |                                          |                                                         |                                  |
| Andrew                      | Young      |         |                  |             |                                          |                                                         |                                  |
| Adrian                      | Bergin     |         |                  |             |                                          |                                                         |                                  |
| Dinesh                      | Tryambake  |         |                  |             |                                          |                                                         |                                  |
| Andrew                      | Sigsworth  |         |                  |             |                                          |                                                         |                                  |
| Aravind                     | Manoj      |         |                  |             |                                          |                                                         |                                  |



Supplemental Online Content: Nonauthor Collaborators

\*Indicates required information. Only first name, last name, and suffix will appear in PubMed.

| First Name, Middle Initial* | Last Name*  | Suffix* | Academic Degrees | Institution | Location (city, state/province, country) | Role or Contribution, eg, chair, principal investigator | Subgroup, eg, Steering Committee |
|-----------------------------|-------------|---------|------------------|-------------|------------------------------------------|---------------------------------------------------------|----------------------------------|
| Paula                       | Lopez       |         |                  |             |                                          |                                                         |                                  |
| Penelope                    | Cox         |         |                  |             |                                          |                                                         |                                  |
| Glyn                        | Fletcher    |         |                  |             |                                          |                                                         |                                  |
| Mark                        | Wilkinson   |         |                  |             |                                          |                                                         |                                  |
| Paul                        | Fitzsimmons |         |                  |             |                                          |                                                         |                                  |
| Nikhil                      | Sharma      |         |                  |             |                                          |                                                         |                                  |
| James                       | Choulerton  |         |                  |             |                                          |                                                         |                                  |
| Denise                      | Button      |         |                  |             |                                          |                                                         |                                  |
| Lindsey                     | Dow         |         |                  |             |                                          |                                                         |                                  |
| Lukuman                     | Gbadamoshi  |         |                  |             |                                          |                                                         |                                  |
| Joanne                      | Avis        |         |                  |             |                                          |                                                         |                                  |
| Barbara                     | Madigan     |         |                  |             |                                          |                                                         |                                  |
| Mccann                      | Stephanie   |         |                  |             |                                          |                                                         |                                  |
| Louise                      | Shaw        |         |                  |             |                                          |                                                         |                                  |
| Deborah                     | Howcroft    |         |                  |             |                                          |                                                         |                                  |
| Suzanne                     | Lucas       |         |                  |             |                                          |                                                         |                                  |
| Andrew                      | Stone       |         |                  |             |                                          |                                                         |                                  |
| Gillian                     | Cluckie     |         |                  |             |                                          |                                                         |                                  |
| Brian                       | Clarke      |         |                  |             |                                          |                                                         |                                  |
| Natasha                     | Clarke      |         |                  |             |                                          |                                                         |                                  |
| Neha                        | Chopra      |         |                  |             |                                          |                                                         |                                  |
| Bhavini                     | Patel       |         |                  |             |                                          |                                                         |                                  |
| Kate                        | Kennedy     |         |                  |             |                                          |                                                         |                                  |
| Rebecca                     | Williams    |         |                  |             |                                          |                                                         |                                  |
| Adrian                      | Blight      |         |                  |             |                                          |                                                         |                                  |
| Joanna                      | Oreilly     |         |                  |             |                                          |                                                         |                                  |
| Chukwuka                    | Orefo       |         |                  |             |                                          |                                                         |                                  |
| Nilofer                     | Dayal       |         |                  |             |                                          |                                                         |                                  |
| Rita                        | Ghatala     |         |                  |             |                                          |                                                         |                                  |

Supplemental Online Content: Nonauthor Collaborators

\*Indicates required information. Only first name, last name, and suffix will appear in PubMed.

| First Name, Middle Initial* | Last Name* | Suffix* | Academic Degrees | Institution | Location (city, state/province, country) | Role or Contribution, eg, chair, principal investigator | Subgroup, eg, Steering Committee |
|-----------------------------|------------|---------|------------------|-------------|------------------------------------------|---------------------------------------------------------|----------------------------------|
| Temi                        | Adedoyin   |         |                  |             |                                          |                                                         |                                  |
| Caroline                    | Lovelock   |         |                  |             |                                          |                                                         |                                  |
| Fran                        | Watson     |         |                  |             |                                          |                                                         |                                  |
| Sarah                       | Trippier   |         |                  |             |                                          |                                                         |                                  |
| Lillian                     | Choy       |         |                  |             |                                          |                                                         |                                  |
| Barry                       | Moynihan   |         |                  |             |                                          |                                                         |                                  |
| Usman                       | Khan       |         |                  |             |                                          |                                                         |                                  |
| Val                         | Jones      |         |                  |             |                                          |                                                         |                                  |
| Naomi                       | Jeyaraj    |         |                  |             |                                          |                                                         |                                  |
| Lourda                      | Kerin      |         |                  |             |                                          |                                                         |                                  |
| Kamy                        | Thavanesan |         |                  |             |                                          |                                                         |                                  |
| Chantel                     | Cox        |         |                  |             |                                          |                                                         |                                  |
| Arshi                       | Iqbal      |         |                  |             |                                          |                                                         |                                  |
| Caroline                    | Bagnall    |         |                  |             |                                          |                                                         |                                  |
| Anja                        | Ljubez     |         |                  |             |                                          |                                                         |                                  |
| Marketa                     | Keltos     |         |                  |             |                                          |                                                         |                                  |
| Josh                        | Roberts    |         |                  |             |                                          |                                                         |                                  |
| Becky                       | Jupp       |         |                  |             |                                          |                                                         |                                  |
| Laura                       | Tucker     |         |                  |             |                                          |                                                         |                                  |
| Tanith                      | Changuion  |         |                  |             |                                          |                                                         |                                  |
| Catherine                   | Ovington   |         |                  |             |                                          |                                                         |                                  |
| Emily                       | Rogers     |         |                  |             |                                          |                                                         |                                  |
| Owen                        | David      |         |                  |             |                                          |                                                         |                                  |
| Jo                          | Bell       |         |                  |             |                                          |                                                         |                                  |
| Barbara                     | Longland   |         |                  |             |                                          |                                                         |                                  |
| Gail                        | Hann       |         |                  |             |                                          |                                                         |                                  |
| Divya                       | Tiwari     |         |                  |             |                                          |                                                         |                                  |
| Martin                      | Cooper     |         |                  |             |                                          |                                                         |                                  |
| Mohammad                    | Nasar      |         |                  |             |                                          |                                                         |                                  |

Supplemental Online Content: Nonauthor Collaborators

\*Indicates required information. Only first name, last name, and suffix will appear in PubMed.

| First Name, Middle Initial* | Last Name*    | Suffix* | Academic Institution Degrees | Location (city, state/province, country) | Role or Contribution, eg, chair, principal investigator | Subgroup, eg, Steering Committee |
|-----------------------------|---------------|---------|------------------------------|------------------------------------------|---------------------------------------------------------|----------------------------------|
| Anoja                       | Rajapakse     |         |                              |                                          |                                                         |                                  |
| Inez                        | Wynter        |         |                              |                                          |                                                         |                                  |
| Ijaz                        | Anwar         |         |                              |                                          |                                                         |                                  |
| Helen                       | Skinner       |         |                              |                                          |                                                         |                                  |
| Tarn                        | Nozedar       |         |                              |                                          |                                                         |                                  |
| Damian                      | Mcardle       |         |                              |                                          |                                                         |                                  |
| Balakrishna                 | Kumar         |         |                              |                                          |                                                         |                                  |
| Susan                       | Crawford      |         |                              |                                          |                                                         |                                  |
| Arunkumar                   | Annamalai     |         |                              |                                          |                                                         |                                  |
| Alex                        | Ramshaw       |         |                              |                                          |                                                         |                                  |
| Clare                       | Holmes        |         |                              |                                          |                                                         |                                  |
| Mairead                     | Osborn        |         |                              |                                          |                                                         |                                  |
| Emily                       | Dodd          |         |                              |                                          |                                                         |                                  |
| Peter                       | Murphy        |         |                              |                                          |                                                         |                                  |
| Nicola                      | Devitt        |         |                              |                                          |                                                         |                                  |
| Pauline                     | Baker         |         |                              |                                          |                                                         |                                  |
| Amy                         | Steele        |         |                              |                                          |                                                         |                                  |
| Lucy Belle                  | Guthrie       |         |                              |                                          |                                                         |                                  |
| Sarah                       | Caine         |         |                              |                                          |                                                         |                                  |
| Samantha                    | Clarke        |         |                              |                                          |                                                         |                                  |
| Ahamad                      | Hassan        |         |                              |                                          |                                                         |                                  |
| Dean                        | Waugh         |         |                              |                                          |                                                         |                                  |
| Emelda                      | Veraque       |         |                              |                                          |                                                         |                                  |
| Linetty                     | Makawa        |         |                              |                                          |                                                         |                                  |
| Mary                        | Kambafwile    |         |                              |                                          |                                                         |                                  |
| Marc                        | Randall       |         |                              |                                          |                                                         |                                  |
| Vasileios                   | Papavasileiou |         |                              |                                          |                                                         |                                  |
| Claire                      | Cullen        |         |                              |                                          |                                                         |                                  |
| Jenny                       | Peters        |         |                              |                                          |                                                         |                                  |

Supplemental Online Content: Nonauthor Collaborators

\*Indicates required information. Only first name, last name, and suffix will appear in PubMed.

| First Name, Middle Initial* | Last Name* | Suffix* | Academic Institution Degrees | Location (city, state/province, country) | Role or Contribution, eg, chair, principal investigator | Subgroup, eg, Steering Committee |
|-----------------------------|------------|---------|------------------------------|------------------------------------------|---------------------------------------------------------|----------------------------------|
| Hlaing                      | Thant      |         |                              |                                          |                                                         |                                  |
| Tanya                       | Ingram     |         |                              |                                          |                                                         |                                  |
| Mellor                      | Zoe        |         |                              |                                          |                                                         |                                  |
| Ramesh                      | Durairaj   |         |                              |                                          |                                                         |                                  |
| Melanie                     | Harrison   |         |                              |                                          |                                                         |                                  |
| Daniela                     | Shackcloth |         |                              |                                          |                                                         |                                  |
| Jordan                      | Ewing      |         |                              |                                          |                                                         |                                  |
| Sarah                       | Stevenson  |         |                              |                                          |                                                         |                                  |
| Victoria                    | Sutton     |         |                              |                                          |                                                         |                                  |
| Mark                        | McCarron   |         |                              |                                          |                                                         |                                  |
| Jacqueline                  | McKee      |         |                              |                                          |                                                         |                                  |
| Mandy                       | Doherty    |         |                              |                                          |                                                         |                                  |
| Ferghal                     | McVerry    |         |                              |                                          |                                                         |                                  |
| Caroline                    | Blair      |         |                              |                                          |                                                         |                                  |
| Donal                       | Concannon  |         |                              |                                          |                                                         |                                  |
| Mary                        | Macleod    |         |                              |                                          |                                                         |                                  |
| Janice                      | Irvine     |         |                              |                                          |                                                         |                                  |
| Heather                     | Gow        |         |                              |                                          |                                                         |                                  |
| Jacqueline                  | Furnace    |         |                              |                                          |                                                         |                                  |
| Anu                         | Joyson     |         |                              |                                          |                                                         |                                  |
| Baljit                      | Jagpal     |         |                              |                                          |                                                         |                                  |
| Sarah                       | Ross       |         |                              |                                          |                                                         |                                  |
| Katrina                     | Klaasen    |         |                              |                                          |                                                         |                                  |
| Beverly                     | MacLennan  |         |                              |                                          |                                                         |                                  |
| Sandra                      | Nelson     |         |                              |                                          |                                                         |                                  |
| Rebecca                     | Clarke     |         |                              |                                          |                                                         |                                  |
| Nichola                     | Crouch     |         |                              |                                          |                                                         |                                  |
| Vicky                       | Taylor     |         |                              |                                          |                                                         |                                  |
| Daniel                      | Epstein    |         |                              |                                          |                                                         |                                  |

Supplemental Online Content: Nonauthor Collaborators

\*Indicates required information. Only first name, last name, and suffix will appear in PubMed.

| First Name, Middle Initial* | Last Name*    | Suffix* | Academic Degrees | Institution | Location (city, state/province, country) | Role or Contribution, eg, chair, principal investigator | Subgroup, eg, Steering Committee |
|-----------------------------|---------------|---------|------------------|-------------|------------------------------------------|---------------------------------------------------------|----------------------------------|
| Avani                       | Shukla        |         |                  |             |                                          |                                                         |                                  |
| Ifan                        | Jones         |         |                  |             |                                          |                                                         |                                  |
| Vinodh                      | Krishnamurthy |         |                  |             |                                          |                                                         |                                  |
| Paul                        | Nicholas      |         |                  |             |                                          |                                                         |                                  |
| Sammie                      | Qureshi       |         |                  |             |                                          |                                                         |                                  |
| Adam                        | Webber        |         |                  |             |                                          |                                                         |                                  |
| Justin                      | Penge         |         |                  |             |                                          |                                                         |                                  |
| Hawraman                    | Ramadan       |         |                  |             |                                          |                                                         |                                  |
| Stuart                      | Maguire       |         |                  |             |                                          |                                                         |                                  |
| Chris                       | Patterson     |         |                  |             |                                          |                                                         |                                  |
| Ruth                        | Bellfield     |         |                  |             |                                          |                                                         |                                  |
| Brigid                      | Hairsine      |         |                  |             |                                          |                                                         |                                  |
| Kelvin                      | Stewart       |         |                  |             |                                          |                                                         |                                  |
| Michaela                    | Hooley        |         |                  |             |                                          |                                                         |                                  |
| Outi                        | Quinn         |         |                  |             |                                          |                                                         |                                  |
| Bella                       | Richard       |         |                  |             |                                          |                                                         |                                  |
| Sally                       | Moseley       |         |                  |             |                                          |                                                         |                                  |
| Claire                      | Nott          |         |                  |             |                                          |                                                         |                                  |
| Steve                       | Buckle        |         |                  |             |                                          |                                                         |                                  |
| Procter                     | Sarah         |         |                  |             |                                          |                                                         |                                  |
| Jessica                     | Whiteman      |         |                  |             |                                          |                                                         |                                  |
| Mandy                       | Edwards       |         |                  |             |                                          |                                                         |                                  |
| Heidi                       | Lawson        |         |                  |             |                                          |                                                         |                                  |
| Rebecca                     | Wallace       |         |                  |             |                                          |                                                         |                                  |
| Claire                      | Triscott      |         |                  |             |                                          |                                                         |                                  |
| Michelle                    | Tayler        |         |                  |             |                                          |                                                         |                                  |
| Yogish                      | Pai           |         |                  |             |                                          |                                                         |                                  |
| Gemma Marie                 | Smith         |         |                  |             |                                          |                                                         |                                  |
| Mark                        | Garside       |         |                  |             |                                          |                                                         |                                  |

Supplemental Online Content: Nonauthor Collaborators

\*Indicates required information. Only first name, last name, and suffix will appear in PubMed.

| First Name, Middle Initial* | Last Name*    | Suffix* | Academic Degrees | Institution | Location (city, state/province, country) | Role or Contribution, eg, chair, principal investigator | Subgroup, eg, Steering Committee |
|-----------------------------|---------------|---------|------------------|-------------|------------------------------------------|---------------------------------------------------------|----------------------------------|
| Mahesh                      | Dhakai        |         |                  |             |                                          |                                                         |                                  |
| Muhammad                    | Naeem         |         |                  |             |                                          |                                                         |                                  |
| Vidya                       | Baliga        |         |                  |             |                                          |                                                         |                                  |
| Gill                        | Rogers        |         |                  |             |                                          |                                                         |                                  |
| Ellen                       | Brown         |         |                  |             |                                          |                                                         |                                  |
| David                       | Bruce         |         |                  |             |                                          |                                                         |                                  |
| Susan                       | Clayton       |         |                  |             |                                          |                                                         |                                  |
| Rachel                      | Hayman        |         |                  |             |                                          |                                                         |                                  |
| Sofia                       | Dima          |         |                  |             |                                          |                                                         |                                  |
| Ed                          | Gamble        |         |                  |             |                                          |                                                         |                                  |
| Rebecca                     | Grue          |         |                  |             |                                          |                                                         |                                  |
| Bethan                      | Charles       |         |                  |             |                                          |                                                         |                                  |
| Adam                        | Hague         |         |                  |             |                                          |                                                         |                                  |
| Sujata                      | Blane         |         |                  |             |                                          |                                                         |                                  |
| Caroline                    | Lambert       |         |                  |             |                                          |                                                         |                                  |
| Afnan                       | Chaudhry      |         |                  |             |                                          |                                                         |                                  |
| Thomas                      | Harrison      |         |                  |             |                                          |                                                         |                                  |
| Laura                       | Howaniec      |         |                  |             |                                          |                                                         |                                  |
| Dionne                      | Hove          |         |                  |             |                                          |                                                         |                                  |
| Gemma                       | Grimwood      |         |                  |             |                                          |                                                         |                                  |
| Kari                        | Saastamoinen  |         |                  |             |                                          |                                                         |                                  |
| Ozlem                       | Redjep        |         |                  |             |                                          |                                                         |                                  |
| Fiona                       | Humphries     |         |                  |             |                                          |                                                         |                                  |
| Lucia                       | Argandona     |         |                  |             |                                          |                                                         |                                  |
| Esther                      | Erumere       |         |                  |             |                                          |                                                         |                                  |
| Sageet                      | Amlani        |         |                  |             |                                          |                                                         |                                  |
| Grace                       | Auld          |         |                  |             |                                          |                                                         |                                  |
| Afraim                      | Salek-Haddadi |         |                  |             |                                          |                                                         |                                  |
| Ursula                      | Schulz        |         |                  |             |                                          |                                                         |                                  |

Supplemental Online Content: Nonauthor Collaborators

\*Indicates required information. Only first name, last name, and suffix will appear in PubMed.

| First Name, Middle Initial* | Last Name* | Suffix* | Academic Degrees | Institution | Location (city, state/province, country) | Role or Contribution, eg, chair, principal investigator | Subgroup, eg, Steering Committee |
|-----------------------------|------------|---------|------------------|-------------|------------------------------------------|---------------------------------------------------------|----------------------------------|
| Philip                      | Mathieson  |         |                  |             |                                          |                                                         |                                  |
| Ian                         | Reckless   |         |                  |             |                                          |                                                         |                                  |
| James                       | Kennedy    |         |                  |             |                                          |                                                         |                                  |
| Gary                        | Ford       |         |                  |             |                                          |                                                         |                                  |
| Rachel                      | Teal       |         |                  |             |                                          |                                                         |                                  |
| Giulia                      | Lenti      |         |                  |             |                                          |                                                         |                                  |
| George                      | Harston    |         |                  |             |                                          |                                                         |                                  |
| Eoin                        | O'Brien    |         |                  |             |                                          |                                                         |                                  |
| Sarah                       | Finlay     |         |                  |             |                                          |                                                         |                                  |
| Helen                       | Hayhoe     |         |                  |             |                                          |                                                         |                                  |
| Sarah                       | Crisp      |         |                  |             |                                          |                                                         |                                  |
| Juliana                     | Sesay      |         |                  |             |                                          |                                                         |                                  |
| George                      | Zachariah  |         |                  |             |                                          |                                                         |                                  |
| Jobbin                      | Francis    |         |                  |             |                                          |                                                         |                                  |
| Dominic                     | Handley    |         |                  |             |                                          |                                                         |                                  |
| Siobhan                     | Kelly      |         |                  |             |                                          |                                                         |                                  |
| Joanne                      | Mcgee      |         |                  |             |                                          |                                                         |                                  |
| Jennifer                    | Mitchell   |         |                  |             |                                          |                                                         |                                  |
| Elaine                      | Amis       |         |                  |             |                                          |                                                         |                                  |
| Niamh                       | Hannon     |         |                  |             |                                          |                                                         |                                  |
| Tom                         | Hughes     |         |                  |             |                                          |                                                         |                                  |
| Bethan                      | Morse      |         |                  |             |                                          |                                                         |                                  |
| Henry                       | De Berker  |         |                  |             |                                          |                                                         |                                  |
| Susan                       | White      |         |                  |             |                                          |                                                         |                                  |
| Emma                        | Tallantyre |         |                  |             |                                          |                                                         |                                  |
| Ahmed                       | Osman      |         |                  |             |                                          |                                                         |                                  |
| Lucy                        | Knibbs     |         |                  |             |                                          |                                                         |                                  |
| Stefan                      | Schwarz    |         |                  |             |                                          |                                                         |                                  |
| Benjamin                    | Jelley     |         |                  |             |                                          |                                                         |                                  |

Supplemental Online Content: Nonauthor Collaborators

\*Indicates required information. Only first name, last name, and suffix will appear in PubMed.

| First Name, Middle Initial* | Last Name*        | Suffix* | Academic Institution Degrees | Location (city, state/province, country) | Role or Contribution, eg, chair, principal investigator | Subgroup, eg, Steering Committee |
|-----------------------------|-------------------|---------|------------------------------|------------------------------------------|---------------------------------------------------------|----------------------------------|
| Rajendra                    | Yadava            |         |                              |                                          |                                                         |                                  |
| Julie                       | Reddan            |         |                              |                                          |                                                         |                                  |
| Mirriam                     | Sangombe          |         |                              |                                          |                                                         |                                  |
| Khalid                      | Azhar             |         |                              |                                          |                                                         |                                  |
| Samantha                    | Stafford          |         |                              |                                          |                                                         |                                  |
| Nasar                       | Ahmad             |         |                              |                                          |                                                         |                                  |
| Ken                         | Fotherby          |         |                              |                                          |                                                         |                                  |
| Debbie                      | Morgan            |         |                              |                                          |                                                         |                                  |
| Farrukh                     | Baig              |         |                              |                                          |                                                         |                                  |
| Karla                       | Jennings-Preece   |         |                              |                                          |                                                         |                                  |
| Donna                       | Butler            |         |                              |                                          |                                                         |                                  |
| Baljinder                   | Rai               |         |                              |                                          |                                                         |                                  |
| Angela                      | Willberry         |         |                              |                                          |                                                         |                                  |
| Angela                      | Stevens           |         |                              |                                          |                                                         |                                  |
| Prasad                      | Siddegowda        |         |                              |                                          |                                                         |                                  |
| Afaq                        | Sulat             |         |                              |                                          |                                                         |                                  |
| Lisa                        | Hyatt             |         |                              |                                          |                                                         |                                  |
| Peter                       | Howard            |         |                              |                                          |                                                         |                                  |
| David                       | Jarrett           |         |                              |                                          |                                                         |                                  |
| Suheil                      | Ponnambath        |         |                              |                                          |                                                         |                                  |
| Tracey                      | Dobson            |         |                              |                                          |                                                         |                                  |
| Jane                        | Tandy             |         |                              |                                          |                                                         |                                  |
| Claire                      | James             |         |                              |                                          |                                                         |                                  |
| Stacey                      | Valentine         |         |                              |                                          |                                                         |                                  |
| Yasmin                      | Harrington-Davies |         |                              |                                          |                                                         |                                  |
| Rebecca                     | Butler            |         |                              |                                          |                                                         |                                  |
| Anne                        | Suttling          |         |                              |                                          |                                                         |                                  |
| Fiona                       | Wright            |         |                              |                                          |                                                         |                                  |
| Gillian                     | Kerr              |         |                              |                                          |                                                         |                                  |



Supplemental Online Content: Nonauthor Collaborators

\*Indicates required information. Only first name, last name, and suffix will appear in PubMed.

| First Name, Middle Initial* | Last Name*  | Suffix* | Academic Degrees | Institution | Location (city, state/province, country) | Role or Contribution, eg, chair, principal investigator | Subgroup, eg, Steering Committee |
|-----------------------------|-------------|---------|------------------|-------------|------------------------------------------|---------------------------------------------------------|----------------------------------|
| Ruth                        | Graham      |         |                  |             |                                          |                                                         |                                  |
| Christine                   | McAlpine    |         |                  |             |                                          |                                                         |                                  |
| Peter                       | Langhorne   |         |                  |             |                                          |                                                         |                                  |
| Mohammad                    | Shahz Iqbal |         |                  |             |                                          |                                                         |                                  |
| Louise                      | Humphreys   |         |                  |             |                                          |                                                         |                                  |
| Kath                        | Pasco       |         |                  |             |                                          |                                                         |                                  |
| Olga                        | Balazikova  |         |                  |             |                                          |                                                         |                                  |
| Ashraf                      | Nasim       |         |                  |             |                                          |                                                         |                                  |
| Cassilda                    | Peixoto     |         |                  |             |                                          |                                                         |                                  |
| Louise                      | Gallagher   |         |                  |             |                                          |                                                         |                                  |
| Shahrzad                    | Shahmehri   |         |                  |             |                                          |                                                         |                                  |
| Sandip                      | Ghosh       |         |                  |             |                                          |                                                         |                                  |
| Elizabeth                   | Barrie      |         |                  |             |                                          |                                                         |                                  |
| Danielle                    | Gilmour     |         |                  |             |                                          |                                                         |                                  |
| Margo                       | Henry       |         |                  |             |                                          |                                                         |                                  |
| Tom                         | Webb        |         |                  |             |                                          |                                                         |                                  |
| Linda                       | Cowie       |         |                  |             |                                          |                                                         |                                  |
| Hannah                      | Rudenko     |         |                  |             |                                          |                                                         |                                  |
| Natasha                     | Schumacher  |         |                  |             |                                          |                                                         |                                  |
| Shanni                      | Mcdonald    |         |                  |             |                                          |                                                         |                                  |
| Susannah                    | Walker      |         |                  |             |                                          |                                                         |                                  |
| Tracey                      | Cosier      |         |                  |             |                                          |                                                         |                                  |
| Anna                        | Verrion     |         |                  |             |                                          |                                                         |                                  |
| Eva                         | Beranova    |         |                  |             |                                          |                                                         |                                  |
| Audrey                      | Thomson     |         |                  |             |                                          |                                                         |                                  |
| Marius                      | Venter      |         |                  |             |                                          |                                                         |                                  |
| Sheila                      | Mashate     |         |                  |             |                                          |                                                         |                                  |
| Kirsten                     | Harvey      |         |                  |             |                                          |                                                         |                                  |
| Léjeune                     | Gardener    |         |                  |             |                                          |                                                         |                                  |

Supplemental Online Content: Nonauthor Collaborators

\*Indicates required information. Only first name, last name, and suffix will appear in PubMed.

| First Name, Middle Initial* | Last Name* | Suffix* | Academic Institution Degrees | Location (city, state/province, country) | Role or Contribution, eg, chair, principal investigator | Subgroup, eg, Steering Committee |
|-----------------------------|------------|---------|------------------------------|------------------------------------------|---------------------------------------------------------|----------------------------------|
| Vinh                        | Nguyen     |         |                              |                                          |                                                         |                                  |
| Omid                        | Halse      |         |                              |                                          |                                                         |                                  |
| Olivia                      | Geraghty   |         |                              |                                          |                                                         |                                  |
| Beth                        | Hazel      |         |                              |                                          |                                                         |                                  |
| Peter                       | Wilding    |         |                              |                                          |                                                         |                                  |
| Victoria                    | Tilley     |         |                              |                                          |                                                         |                                  |
| Arindam                     | Kar        |         |                              |                                          |                                                         |                                  |
| Louise                      | Southern   |         |                              |                                          |                                                         |                                  |
| Tim                         | Cassidy    |         |                              |                                          |                                                         |                                  |
| Bernard                     | Esi        |         |                              |                                          |                                                         |                                  |
| Beverley                    | McClelland |         |                              |                                          |                                                         |                                  |
| Maria                       | Bokhari    |         |                              |                                          |                                                         |                                  |
| Timothy                     | England    |         |                              |                                          |                                                         |                                  |
| Amanda                      | Hedstrom   |         |                              |                                          |                                                         |                                  |
| Mohana                      | Maddula    |         |                              |                                          |                                                         |                                  |
| Richard                     | Donnelly   |         |                              |                                          |                                                         |                                  |
| Paul                        | Findlay    |         |                              |                                          |                                                         |                                  |
| Ian                         | Shread     |         |                              |                                          |                                                         |                                  |
| Ashish                      | Macaden    |         |                              |                                          |                                                         |                                  |
| Charlotte                   | Barr       |         |                              |                                          |                                                         |                                  |
| Azlisham                    | Mohd Nor   |         |                              |                                          |                                                         |                                  |
| Nicola                      | Persad     |         |                              |                                          |                                                         |                                  |
| Charlotte                   | Eglinton   |         |                              |                                          |                                                         |                                  |
| Marie                       | Weinling   |         |                              |                                          |                                                         |                                  |
| Claire                      | Brown      |         |                              |                                          |                                                         |                                  |
| Benjamin                    | Hyams      |         |                              |                                          |                                                         |                                  |
| Alex                        | Shah       |         |                              |                                          |                                                         |                                  |
| John                        | Baker      |         |                              |                                          |                                                         |                                  |
| Anthony                     | Byrne      |         |                              |                                          |                                                         |                                  |

Supplemental Online Content: Nonauthor Collaborators

\*Indicates required information. Only first name, last name, and suffix will appear in PubMed.

| First Name, Middle Initial* | Last Name* | Suffix* | Academic Institution Degrees | Location (city, state/province, country) | Role or Contribution, eg, chair, principal investigator | Subgroup, eg, Steering Committee |
|-----------------------------|------------|---------|------------------------------|------------------------------------------|---------------------------------------------------------|----------------------------------|
| Caroline                    | Mcghee     |         |                              |                                          |                                                         |                                  |
| Amanda                      | Smart      |         |                              |                                          |                                                         |                                  |
| Claire                      | Copeland   |         |                              |                                          |                                                         |                                  |
| Michael                     | Carpenter  |         |                              |                                          |                                                         |                                  |
| Marion                      | Walker     |         |                              |                                          |                                                         |                                  |
| Richard                     | Davey      |         |                              |                                          |                                                         |                                  |
| Ann                         | Needle     |         |                              |                                          |                                                         |                                  |
| Razik                       | Fathima    |         |                              |                                          |                                                         |                                  |
| Gavin                       | Bateman    |         |                              |                                          |                                                         |                                  |
| Andrew                      | Stanners   |         |                              |                                          |                                                         |                                  |
| Prabal                      | Datta      |         |                              |                                          |                                                         |                                  |
| Linda                       | Jackson    |         |                              |                                          |                                                         |                                  |
| Julie                       | Ball       |         |                              |                                          |                                                         |                                  |
| Michelle                    | Davis      |         |                              |                                          |                                                         |                                  |
| Natalie                     | Atkinson   |         |                              |                                          |                                                         |                                  |
| Michelle                    | Fawcett    |         |                              |                                          |                                                         |                                  |
| Teresa                      | Thompson   |         |                              |                                          |                                                         |                                  |
| Helen                       | Guy        |         |                              |                                          |                                                         |                                  |
| Valerie                     | Hogg       |         |                              |                                          |                                                         |                                  |
| Carole                      | Hays       |         |                              |                                          |                                                         |                                  |
| Stephen                     | Woodward   |         |                              |                                          |                                                         |                                  |
| Mohammad                    | Haque      |         |                              |                                          |                                                         |                                  |
| Stuart                      | Symonds    |         |                              |                                          |                                                         |                                  |
| Mehran                      | Maanoosi   |         |                              |                                          |                                                         |                                  |
| Jane                        | Herman     |         |                              |                                          |                                                         |                                  |
| Toby                        | Black      |         |                              |                                          |                                                         |                                  |
| Caroline                    | Clarke     |         |                              |                                          |                                                         |                                  |
| Skelton                     | Miriam     |         |                              |                                          |                                                         |                                  |
| Alpha                       | Anthony    |         |                              |                                          |                                                         |                                  |

Supplemental Online Content: Nonauthor Collaborators

\*Indicates required information. Only first name, last name, and suffix will appear in PubMed.

| First Name, Middle Initial* | Last Name* | Suffix* | Academic Degrees | Institution | Location (city, state/province, country) | Role or Contribution, eg, chair, principal investigator | Subgroup, eg, Steering Committee |
|-----------------------------|------------|---------|------------------|-------------|------------------------------------------|---------------------------------------------------------|----------------------------------|
| Michele                     | Tribbeck   |         |                  |             |                                          |                                                         |                                  |
| Julie                       | Cronin     |         |                  |             |                                          |                                                         |                                  |
| Denise                      | Mead       |         |                  |             |                                          |                                                         |                                  |
| Ruth                        | Fennelly   |         |                  |             |                                          |                                                         |                                  |
| James                       | McIlmoyle  |         |                  |             |                                          |                                                         |                                  |
| Christina                   | Dickinson  |         |                  |             |                                          |                                                         |                                  |
| Carol                       | Jeffs      |         |                  |             |                                          |                                                         |                                  |
| Joanne                      | Howard     |         |                  |             |                                          |                                                         |                                  |
| Sajjad                      | Anwar      |         |                  |             |                                          |                                                         |                                  |
| Kirsty                      | Jones      |         |                  |             |                                          |                                                         |                                  |
| Saikat                      | Dhar       |         |                  |             |                                          |                                                         |                                  |
| Muhammad                    | Siddiq     |         |                  |             |                                          |                                                         |                                  |
| Caroline                    | Clay       |         |                  |             |                                          |                                                         |                                  |
| Simone                      | Ivatts     |         |                  |             |                                          |                                                         |                                  |
| Yolanda                     | Baird      |         |                  |             |                                          |                                                         |                                  |
| Moore                       | Sally      |         |                  |             |                                          |                                                         |                                  |
| Lisa                        | Clayton-   | Evans   |                  |             |                                          |                                                         |                                  |
| Sophie                      | Newton     |         |                  |             |                                          |                                                         |                                  |
| Isobel                      | Amey       |         |                  |             |                                          |                                                         |                                  |
| Indra                       | Chadbourn  |         |                  |             |                                          |                                                         |                                  |
| Rayessa                     | Rayessa    |         |                  |             |                                          |                                                         |                                  |
| Lisa                        | Wilson     |         |                  |             |                                          |                                                         |                                  |
| Alicia                      | Rodgers    |         |                  |             |                                          |                                                         |                                  |
| Charde                      | Naylor     |         |                  |             |                                          |                                                         |                                  |
| Sarah                       | Wilson     |         |                  |             |                                          |                                                         |                                  |
| Emma                        | Clarkson   |         |                  |             |                                          |                                                         |                                  |
| Ruth                        | Davies     |         |                  |             |                                          |                                                         |                                  |
| Paula                       | Owings     |         |                  |             |                                          |                                                         |                                  |
| Graeme                      | Sangster   |         |                  |             |                                          |                                                         |                                  |

Supplemental Online Content: Nonauthor Collaborators

\*Indicates required information. Only first name, last name, and suffix will appear in PubMed.

| First Name, Middle Initial* | Last Name*          | Suffix* | Academic Institution Degrees | Location (city, state/province, country) | Role or Contribution, eg, chair, principal investigator | Subgroup, eg, Steering Committee |
|-----------------------------|---------------------|---------|------------------------------|------------------------------------------|---------------------------------------------------------|----------------------------------|
| Valerie                     | Gott                |         |                              |                                          |                                                         |                                  |
| Victoria                    | Little              |         |                              |                                          |                                                         |                                  |
| Pauline                     | Weir                |         |                              |                                          |                                                         |                                  |
| Suja                        | Cherian             |         |                              |                                          |                                                         |                                  |
| Deepa                       | Jose                |         |                              |                                          |                                                         |                                  |
| Helen                       | Moroney             |         |                              |                                          |                                                         |                                  |
| Susan                       | Downham             |         |                              |                                          |                                                         |                                  |
| Angela                      | Dodd                |         |                              |                                          |                                                         |                                  |
| Venetia                     | Vettimootal Johnson |         |                              |                                          |                                                         |                                  |
| Laura                       | Codd                |         |                              |                                          |                                                         |                                  |
| Naomi                       | Robinson            |         |                              |                                          |                                                         |                                  |
| Ashraf                      | Ahmed               |         |                              |                                          |                                                         |                                  |
| Sharon                      | Johnson             |         |                              |                                          |                                                         |                                  |
| Carol                       | Denniss             |         |                              |                                          |                                                         |                                  |
| Mo                          | Albazzaz            |         |                              |                                          |                                                         |                                  |
| Mishell                     | Cunningham          |         |                              |                                          |                                                         |                                  |
| Tajammal                    | Zahoor              |         |                              |                                          |                                                         |                                  |
| Timothy                     | Webster             |         |                              |                                          |                                                         |                                  |
| Sandra                      | Leason              |         |                              |                                          |                                                         |                                  |
| Syed                        | Haider              |         |                              |                                          |                                                         |                                  |
| Kausic                      | Chatterjee          |         |                              |                                          |                                                         |                                  |
| Arumugam                    | Nallasivan          |         |                              |                                          |                                                         |                                  |
| Charlotte                   | Perkins             |         |                              |                                          |                                                         |                                  |
| Samantha                    | Seagrave            |         |                              |                                          |                                                         |                                  |
| Colin                       | Jenkins             |         |                              |                                          |                                                         |                                  |
| Fiona                       | Price               |         |                              |                                          |                                                         |                                  |
| Claire                      | Hughes              |         |                              |                                          |                                                         |                                  |
| Lily                        | Mercer              |         |                              |                                          |                                                         |                                  |
| Malik                       | Hussain             |         |                              |                                          |                                                         |                                  |

Supplemental Online Content: Nonauthor Collaborators

\*Indicates required information. Only first name, last name, and suffix will appear in PubMed.

| First Name, Middle Initial* | Last Name* | Suffix* | Academic Institution Degrees | Location (city, state/province, country) | Role or Contribution, eg, chair, principal investigator | Subgroup, eg, Steering Committee |
|-----------------------------|------------|---------|------------------------------|------------------------------------------|---------------------------------------------------------|----------------------------------|
| Sarah                       | Brown      |         |                              |                                          |                                                         |                                  |
| Miriam                      | Harvey     |         |                              |                                          |                                                         |                                  |
| Robert                      | Whiting    |         |                              |                                          |                                                         |                                  |
| Mohammad                    | Khan       |         |                              |                                          |                                                         |                                  |
| Jane                        | Homan      |         |                              |                                          |                                                         |                                  |
| Leanne                      | Foote      |         |                              |                                          |                                                         |                                  |
| Nicholas                    | Hunt       |         |                              |                                          |                                                         |                                  |
| Helen                       | Durman     |         |                              |                                          |                                                         |                                  |
| Lucy                        | Brotherton |         |                              |                                          |                                                         |                                  |
| Jayne                       | Foot       |         |                              |                                          |                                                         |                                  |
| Corinne                     | Pawley     |         |                              |                                          |                                                         |                                  |
| Eliza                       | Foster     |         |                              |                                          |                                                         |                                  |
| Alison                      | Whitcher   |         |                              |                                          |                                                         |                                  |
| Kneale                      | Metcalf    |         |                              |                                          |                                                         |                                  |
| Jenny                       | Jagger     |         |                              |                                          |                                                         |                                  |
| Susan                       | McDonald   |         |                              |                                          |                                                         |                                  |
| Kelly                       | Waterfield |         |                              |                                          |                                                         |                                  |
| Patrick                     | Sutton     |         |                              |                                          |                                                         |                                  |
| Naval                       | Shinh      |         |                              |                                          |                                                         |                                  |
| Ajmal                       | Anversha   |         |                              |                                          |                                                         |                                  |
| Garth                       | Ravenhill  |         |                              |                                          |                                                         |                                  |
| Richard                     | Greenwood  |         |                              |                                          |                                                         |                                  |
| Janak                       | Saada      |         |                              |                                          |                                                         |                                  |
| Alison                      | Wiltshire  |         |                              |                                          |                                                         |                                  |
| Rebekah                     | Perfitt    |         |                              |                                          |                                                         |                                  |
| Magdalini                   | Krommyda   |         |                              |                                          |                                                         |                                  |
| Evelyne                     | Burssens   |         |                              |                                          |                                                         |                                  |
| Naveen                      | Gadapa     |         |                              |                                          |                                                         |                                  |
| Karen                       | Dunne      |         |                              |                                          |                                                         |                                  |

Supplemental Online Content: Nonauthor Collaborators

\*Indicates required information. Only first name, last name, and suffix will appear in PubMed.

| First Name, Middle Initial* | Last Name*    | Suffix* | Academic Degrees | Institution | Location (city, state/province, country) | Role or Contribution, eg, chair, principal investigator | Subgroup, eg, Steering Committee |
|-----------------------------|---------------|---------|------------------|-------------|------------------------------------------|---------------------------------------------------------|----------------------------------|
| Sreeman                     | Andole        |         |                  |             |                                          |                                                         |                                  |
| Sam                         | King          |         |                  |             |                                          |                                                         |                                  |
| Catherine                   | Plewa         |         |                  |             |                                          |                                                         |                                  |
| Nigel                       | Smyth         |         |                  |             |                                          |                                                         |                                  |
| Jenny                       | Wilson        |         |                  |             |                                          |                                                         |                                  |
| Elio                        | Giallombardo  |         |                  |             |                                          |                                                         |                                  |
| Charlotte                   | Eglinton      |         |                  |             |                                          |                                                         |                                  |
| Lucy                        | Sykes         |         |                  |             |                                          |                                                         |                                  |
| Pradeep                     | Kumar         |         |                  |             |                                          |                                                         |                                  |
| James                       | Barker        |         |                  |             |                                          |                                                         |                                  |
| Linda                       | Dunn          |         |                  |             |                                          |                                                         |                                  |
| Isabel                      | Huggett       |         |                  |             |                                          |                                                         |                                  |
| Charlotte                   | Culmsee       |         |                  |             |                                          |                                                         |                                  |
| Philip                      | Thomas        |         |                  |             |                                          |                                                         |                                  |
| Min                         | Myint         |         |                  |             |                                          |                                                         |                                  |
| Helen                       | Brew          |         |                  |             |                                          |                                                         |                                  |
| Nikhil                      | Majmudar      |         |                  |             |                                          |                                                         |                                  |
| Janice                      | Oconnell      |         |                  |             |                                          |                                                         |                                  |
| George                      | Bunea         |         |                  |             |                                          |                                                         |                                  |
| Charlotte                   | Fox           |         |                  |             |                                          |                                                         |                                  |
| Diane                       | Gulliver      |         |                  |             |                                          |                                                         |                                  |
| Andrew                      | Smith         |         |                  |             |                                          |                                                         |                                  |
| Betty                       | Mokoena       |         |                  |             |                                          |                                                         |                                  |
| Naweed                      | Sattar        |         |                  |             |                                          |                                                         |                                  |
| Ramesh                      | Krishnamurthy |         |                  |             |                                          |                                                         |                                  |
| Emily                       | Osborne       |         |                  |             |                                          |                                                         |                                  |
| David                       | Wilson        |         |                  |             |                                          |                                                         |                                  |
| Belinda                     | Wroath        |         |                  |             |                                          |                                                         |                                  |
| Kevin                       | Dynan         |         |                  |             |                                          |                                                         |                                  |

Supplemental Online Content: Nonauthor Collaborators

\*Indicates required information. Only first name, last name, and suffix will appear in PubMed.

| First Name, Middle Initial* | Last Name*   | Suffix* | Academic Institution Degrees | Location (city, state/province, country) | Role or Contribution, eg, chair, principal investigator | Subgroup, eg, Steering Committee |
|-----------------------------|--------------|---------|------------------------------|------------------------------------------|---------------------------------------------------------|----------------------------------|
| Michael                     | Power        |         |                              |                                          |                                                         |                                  |
| Susan                       | Thompson     |         |                              |                                          |                                                         |                                  |
| Victoria                    | Adell        |         |                              |                                          |                                                         |                                  |
| Enoch                       | Orugun       |         |                              |                                          |                                                         |                                  |
| Una                         | Poultney     |         |                              |                                          |                                                         |                                  |
| Rachel                      | Glover       |         |                              |                                          |                                                         |                                  |
| Hannah                      | Crowther     |         |                              |                                          |                                                         |                                  |
| Sarah                       | Thornthwaite |         |                              |                                          |                                                         |                                  |
| Ivan                        | Wiggam       |         |                              |                                          |                                                         |                                  |
| Aine                        | Wallace      |         |                              |                                          |                                                         |                                  |
| Enda                        | Kerr         |         |                              |                                          |                                                         |                                  |
| Ailsa                       | Fulton       |         |                              |                                          |                                                         |                                  |
| Annemarie                   | Hunter       |         |                              |                                          |                                                         |                                  |
| Suzanne                     | Tauro        |         |                              |                                          |                                                         |                                  |
| Sarah                       | Cuddy        |         |                              |                                          |                                                         |                                  |
| David                       | Mangion      |         |                              |                                          |                                                         |                                  |
| Skarlet                     | Markova      |         |                              |                                          |                                                         |                                  |
| Anne                        | Hardwick     |         |                              |                                          |                                                         |                                  |
| Tara                        | Lawrence     |         |                              |                                          |                                                         |                                  |
| Carmen                      | Constantin   |         |                              |                                          |                                                         |                                  |
| Jo                          | Fletecher    |         |                              |                                          |                                                         |                                  |
| Isobel                      | Thomas       |         |                              |                                          |                                                         |                                  |
| Kerry                       | Pettitt      |         |                              |                                          |                                                         |                                  |
| Lakshmanan                  | Sekaran      |         |                              |                                          |                                                         |                                  |
| Frances                     | Justin       |         |                              |                                          |                                                         |                                  |
| Margaret                    | Tate         |         |                              |                                          |                                                         |                                  |
| Kiranjit                    | Bharaj       |         |                              |                                          |                                                         |                                  |
| Rohan                       | Simon        |         |                              |                                          |                                                         |                                  |
| Niaz                        | Mohammed     |         |                              |                                          |                                                         |                                  |



Supplemental Online Content: Nonauthor Collaborators

\*Indicates required information. Only first name, last name, and suffix will appear in PubMed.

| First Name, Middle Initial* | Last Name* | Suffix* | Academic Degrees | Institution | Location (city, state/province, country) | Role or Contribution, eg, chair, principal investigator | Subgroup, eg, Steering Committee |
|-----------------------------|------------|---------|------------------|-------------|------------------------------------------|---------------------------------------------------------|----------------------------------|
| Sakthivel                   | Sethuraman |         |                  |             |                                          |                                                         |                                  |
| Duke                        | Phiri      |         |                  |             |                                          |                                                         |                                  |
| Meena                       | Chauhan    |         |                  |             |                                          |                                                         |                                  |
| Khaled                      | Elfandi    |         |                  |             |                                          |                                                         |                                  |
| Samantha                    | Stafford   |         |                  |             |                                          |                                                         |                                  |
| Uzma                        | Khan       |         |                  |             |                                          |                                                         |                                  |
| Julie                       | Reddan     |         |                  |             |                                          |                                                         |                                  |
| David                       | Eveson     |         |                  |             |                                          |                                                         |                                  |
| Amit                        | Mistri     |         |                  |             |                                          |                                                         |                                  |
| Lisa                        | Manning    |         |                  |             |                                          |                                                         |                                  |
| Shagufta                    | Khan       |         |                  |             |                                          |                                                         |                                  |
| Champa                      | Patel      |         |                  |             |                                          |                                                         |                                  |
| Mohammed                    | Moqsith    |         |                  |             |                                          |                                                         |                                  |
| Saira                       | Sattar     |         |                  |             |                                          |                                                         |                                  |
| Man Yee                     | Lam        |         |                  |             |                                          |                                                         |                                  |
| Kashif                      | Musarrat   |         |                  |             |                                          |                                                         |                                  |
| Claire                      | Stephens   |         |                  |             |                                          |                                                         |                                  |
| Latheef                     | Kalathil   |         |                  |             |                                          |                                                         |                                  |
| Richard                     | Miller     |         |                  |             |                                          |                                                         |                                  |
| Maqsud                      | Salehin    |         |                  |             |                                          |                                                         |                                  |
| Nikki                       | Gautam     |         |                  |             |                                          |                                                         |                                  |
| Duncan                      | Bailey     |         |                  |             |                                          |                                                         |                                  |
| Amor                        | Kelly      |         |                  |             |                                          |                                                         |                                  |
| Julie                       | Meir       |         |                  |             |                                          |                                                         |                                  |
| Javed                       | Imam       |         |                  |             |                                          |                                                         |                                  |
| Lisa                        | Wood       |         |                  |             |                                          |                                                         |                                  |
| Anne                        | Nicolson   |         |                  |             |                                          |                                                         |                                  |
| Julie                       | White      |         |                  |             |                                          |                                                         |                                  |
| Mahmud                      | Sajid      |         |                  |             |                                          |                                                         |                                  |

Supplemental Online Content: Nonauthor Collaborators

\*Indicates required information. Only first name, last name, and suffix will appear in PubMed.

| First Name, Middle Initial* | Last Name* | Suffix* | Academic Degrees | Institution | Location (city, state/province, country) | Role or Contribution, eg, chair, principal investigator | Subgroup, eg, Steering Committee |
|-----------------------------|------------|---------|------------------|-------------|------------------------------------------|---------------------------------------------------------|----------------------------------|
| George                      | Ghaly      |         |                  |             |                                          |                                                         |                                  |
| Margaret                    | Ball       |         |                  |             |                                          |                                                         |                                  |
| Rachel                      | Gascoyne   |         |                  |             |                                          |                                                         |                                  |
| Harald                      | Proeschel  |         |                  |             |                                          |                                                         |                                  |
| Simon                       | Sharpe     |         |                  |             |                                          |                                                         |                                  |
| Sarah                       | Horton     |         |                  |             |                                          |                                                         |                                  |
| Emily                       | Beaves     |         |                  |             |                                          |                                                         |                                  |
| Stephanie                   | Jones      |         |                  |             |                                          |                                                         |                                  |
| Brigitte                    | Yip        |         |                  |             |                                          |                                                         |                                  |
| Murdina                     | Bell       |         |                  |             |                                          |                                                         |                                  |
| Linda                       | MacLiver   |         |                  |             |                                          |                                                         |                                  |
| Brian                       | MacInnes   |         |                  |             |                                          |                                                         |                                  |
| Derek                       | Esson      |         |                  |             |                                          |                                                         |                                  |
| Don                         | Sims       |         |                  |             |                                          |                                                         |                                  |
| Jennifer                    | Hurley     |         |                  |             |                                          |                                                         |                                  |
| Mark                        | Willmot    |         |                  |             |                                          |                                                         |                                  |
| Claire                      | Sutton     |         |                  |             |                                          |                                                         |                                  |
| Edward                      | Littleton  |         |                  |             |                                          |                                                         |                                  |
| Susan                       | Maiden     |         |                  |             |                                          |                                                         |                                  |
| Rachael                     | Jones      |         |                  |             |                                          |                                                         |                                  |
| James                       | Cunningham |         |                  |             |                                          |                                                         |                                  |
| Carole                      | Green      |         |                  |             |                                          |                                                         |                                  |
| Michelle                    | Bates      |         |                  |             |                                          |                                                         |                                  |
| Raj                         | Shekhar    |         |                  |             |                                          |                                                         |                                  |
| Kelly                       | Waterfield |         |                  |             |                                          |                                                         |                                  |
| Ellie                       | Gilham     |         |                  |             |                                          |                                                         |                                  |
| Iman                        | Ahmed      |         |                  |             |                                          |                                                         |                                  |
| Rachel                      | Crown      |         |                  |             |                                          |                                                         |                                  |
| Tracy                       | Fuller     |         |                  |             |                                          |                                                         |                                  |

Supplemental Online Content: Nonauthor Collaborators

\*Indicates required information. Only first name, last name, and suffix will appear in PubMed.

| First Name, Middle Initial* | Last Name*     | Suffix* | Academic Institution Degrees | Location (city, state/province, country) | Role or Contribution, eg, chair, principal investigator | Subgroup, eg, Steering Committee |
|-----------------------------|----------------|---------|------------------------------|------------------------------------------|---------------------------------------------------------|----------------------------------|
| Neetish                     | Goorah         |         |                              |                                          |                                                         |                                  |
| Angela                      | Bell           |         |                              |                                          |                                                         |                                  |
| Christine                   | Kelly          |         |                              |                                          |                                                         |                                  |
| Arun                        | Singh          |         |                              |                                          |                                                         |                                  |
| Jamie                       | Walford        |         |                              |                                          |                                                         |                                  |
| Benjamin                    | Tomlinson      |         |                              |                                          |                                                         |                                  |
| Farzana                     | Patel          |         |                              |                                          |                                                         |                                  |
| Stephen                     | Duberley       |         |                              |                                          |                                                         |                                  |
| Ingrid                      | Kane           |         |                              |                                          |                                                         |                                  |
| Nicola                      | Gainsborough   |         |                              |                                          |                                                         |                                  |
| Chakravarthi                | Rajkumar       |         |                              |                                          |                                                         |                                  |
| Jane                        | Gaylard        |         |                              |                                          |                                                         |                                  |
| Joanna                      | Breeds         |         |                              |                                          |                                                         |                                  |
| Alexandra                   | Pitt-Ford      |         |                              |                                          |                                                         |                                  |
| Emma                        | Barbon         |         |                              |                                          |                                                         |                                  |
| Laura                       | Latter         |         |                              |                                          |                                                         |                                  |
| Philip                      | Thompson       |         |                              |                                          |                                                         |                                  |
| Simon                       | Hervey         |         |                              |                                          |                                                         |                                  |
| Joseph                      | Vassallo       |         |                              |                                          |                                                         |                                  |
| Shrivakumar                 | Krishnamoorthy |         |                              |                                          |                                                         |                                  |
| Deborah                     | Walter         |         |                              |                                          |                                                         |                                  |
| Helen                       | Cochrane       |         |                              |                                          |                                                         |                                  |
| Meena                       | Srinivasan     |         |                              |                                          |                                                         |                                  |
| Robert                      | Campbell       |         |                              |                                          |                                                         |                                  |
| Denise                      | Donaldson      |         |                              |                                          |                                                         |                                  |
| Nichola                     | Motherwell     |         |                              |                                          |                                                         |                                  |
| Frances                     | Hurford        |         |                              |                                          |                                                         |                                  |
| Indranil                    | Mukherjee      |         |                              |                                          |                                                         |                                  |
| Antony                      | Kenton         |         |                              |                                          |                                                         |                                  |

Supplemental Online Content: Nonauthor Collaborators

\*Indicates required information. Only first name, last name, and suffix will appear in PubMed.

| First Name, Middle Initial* | Last Name*        | Suffix* | Academic Degrees | Institution | Location (city, state/province, country) | Role or Contribution, eg, chair, principal investigator | Subgroup, eg, Steering Committee |
|-----------------------------|-------------------|---------|------------------|-------------|------------------------------------------|---------------------------------------------------------|----------------------------------|
| Sheila                      | Nyabadza          |         |                  |             |                                          |                                                         |                                  |
| Irene                       | Martin            |         |                  |             |                                          |                                                         |                                  |
| Benjamin                    | Hunt              |         |                  |             |                                          |                                                         |                                  |
| Hardi                       | Hassan            |         |                  |             |                                          |                                                         |                                  |
| Bander                      | Dallol            |         |                  |             |                                          |                                                         |                                  |
| Sarah                       | O'toole           |         |                  |             |                                          |                                                         |                                  |
| Janet                       | Putterill         |         |                  |             |                                          |                                                         |                                  |
| Ratneshwari                 | Jha               |         |                  |             |                                          |                                                         |                                  |
| Rachel                      | Gallifent         |         |                  |             |                                          |                                                         |                                  |
| Puneet                      | Kakar             |         |                  |             |                                          |                                                         |                                  |
| Aparna                      | Pusalkar          |         |                  |             |                                          |                                                         |                                  |
| Kelly                       | Chan              |         |                  |             |                                          |                                                         |                                  |
| Puneet                      | Dangri            |         |                  |             |                                          |                                                         |                                  |
| Hannah                      | Beadle            |         |                  |             |                                          |                                                         |                                  |
| Angela                      | Cook              |         |                  |             |                                          |                                                         |                                  |
| Karen                       | Crabtree          |         |                  |             |                                          |                                                         |                                  |
| Santhosh                    | Subramonian       |         |                  |             |                                          |                                                         |                                  |
| Natalie                     | Temple            |         |                  |             |                                          |                                                         |                                  |
| Peter                       | Owusu-Agyei       |         |                  |             |                                          |                                                         |                                  |
| Nicola                      | Butterworth-Cowin |         |                  |             |                                          |                                                         |                                  |
| Suzanne                     | Ragab             |         |                  |             |                                          |                                                         |                                  |
| Kerstin                     | Knops             |         |                  |             |                                          |                                                         |                                  |
| Emma                        | Jinks             |         |                  |             |                                          |                                                         |                                  |
| Judith                      | Dube              |         |                  |             |                                          |                                                         |                                  |
| Christine                   | Dickson           |         |                  |             |                                          |                                                         |                                  |
| Laura                       | Gleave            |         |                  |             |                                          |                                                         |                                  |
| Jacqui                      | Leggett           |         |                  |             |                                          |                                                         |                                  |
| Tatiana                     | Garcia            |         |                  |             |                                          |                                                         |                                  |
| Sissy                       | Ispoglou          |         |                  |             |                                          |                                                         |                                  |

Supplemental Online Content: Nonauthor Collaborators

\*Indicates required information. Only first name, last name, and suffix will appear in PubMed.

| First Name, Middle Initial* | Last Name* | Suffix* | Academic Degrees | Institution | Location (city, state/province, country) | Role or Contribution, eg, chair, principal investigator | Subgroup, eg, Steering Committee |
|-----------------------------|------------|---------|------------------|-------------|------------------------------------------|---------------------------------------------------------|----------------------------------|
| Rachel                      | Evans      |         |                  |             |                                          |                                                         |                                  |
| Sandeep                     | Ankolekar  |         |                  |             |                                          |                                                         |                                  |
| Anne                        | Hayes      |         |                  |             |                                          |                                                         |                                  |
| Hlaing                      | Ni         |         |                  |             |                                          |                                                         |                                  |
| Josette                     | Milligan   |         |                  |             |                                          |                                                         |                                  |
| Bithi                       | Rahman     |         |                  |             |                                          |                                                         |                                  |
| Carol                       | Graham     |         |                  |             |                                          |                                                         |                                  |
| Josin                       | Jose       |         |                  |             |                                          |                                                         |                                  |
| Breffni                     | Keegan     |         |                  |             |                                          |                                                         |                                  |
| Mandy                       | Doherty    |         |                  |             |                                          |                                                         |                                  |
| Jim                         | Kelly      |         |                  |             |                                          |                                                         |                                  |
| Caroline                    | Blair      |         |                  |             |                                          |                                                         |                                  |
| Donal                       | Concannon  |         |                  |             |                                          |                                                         |                                  |
| James                       | White      |         |                  |             |                                          |                                                         |                                  |
| Kelly                       | Thomas     |         |                  |             |                                          |                                                         |                                  |
| Lisa                        | Mellish    |         |                  |             |                                          |                                                         |                                  |
| Richard                     | Dewar      |         |                  |             |                                          |                                                         |                                  |
