# Supplementary material for: Effects of Antiplatelet Therapy After Stroke Caused by Intracerebral Hemorrhage: Extended Follow-up of the RESTART Randomized Clinical Trial
Source: PubMed Central journal article supplement (PMC8417806; doi:10.1001/jamaneurol.2021.2956), 2021-09-03
Supplement: jamaneurol-e212956-s004.pdf [file jamaneurol-e212956-s004.pdf]

# Data Sharing Statement

Al-Shahi Salman. Effects of Antiplatelet Therapy After Stroke Caused by Intracerebral Hemorrhage. *JAMA Neurol.* Published September 03, 2021. doi:10.1001/jamaneurol.2021.2956

## Data

**Data available:** Yes

**Data types:** Deidentified participant data, Data dictionary

**How to access data:** University of Edinburgh Datashare

**When available:** beginning date: September 3, 2022

## Supporting Documents

**Document types:** None

## Additional Information

**Who can access the data:** Researchers whose proposed use of the data has been approved

**Types of analyses:** Specified purposes

**Mechanisms of data availability:** After approval of a proposal
